# Supplementary material
Source: publisher figshare collection journal article supplement (https://acs.figshare.com/ndownloader/files/4274932)
Supplement: Supplementary file 1 [file 4274932]

 
data_twm33 
 
_audit_creation_method            SHELXL-97 
_chemical_name_systematic 
; 
 ? 
; 
_chemical_name_common             ? 
_chemical_melting_point           ? 
_chemical_formula_moiety          ? 
_chemical_formula_sum 
 'C49.40 H63 Al N4 Na O5' 
_chemical_formula_weight          842.81 
 
loop_ 
 _atom_type_symbol 
 _atom_type_description 
 _atom_type_scat_dispersion_real 
 _atom_type_scat_dispersion_imag 
 _atom_type_scat_source 
 'C'  'C'   0.0181   0.0091 
 'International Tables Vol C Tables 4.2.6.8 and 6.1.1.4' 
 'H'  'H'   0.0000   0.0000 
 'International Tables Vol C Tables 4.2.6.8 and 6.1.1.4' 
 'Al'  'Al'   0.2130   0.2455 
 'International Tables Vol C Tables 4.2.6.8 and 6.1.1.4' 
 'N'  'N'   0.0311   0.0180 
 'International Tables Vol C Tables 4.2.6.8 and 6.1.1.4' 
 'Na'  'Na'   0.1353   0.1239 
 'International Tables Vol C Tables 4.2.6.8 and 6.1.1.4' 
 'O'  'O'   0.0492   0.0322 
 'International Tables Vol C Tables 4.2.6.8 and 6.1.1.4' 
 
_symmetry_cell_setting            monoclinic 
_symmetry_space_group_name_H-M    p21/c 
 
loop_ 
 _symmetry_equiv_pos_as_xyz 
 'x, y, z' 
 '-x, y+1/2, -z+1/2' 
 '-x, -y, -z' 
 'x, -y-1/2, z-1/2' 
 
_cell_length_a                    18.9944(6) 
_cell_length_b                    11.5379(4) 
_cell_length_c                    23.2756(7) 
_cell_angle_alpha                 90.00 
_cell_angle_beta                  93.444(2) 
_cell_angle_gamma                 90.00 
_cell_volume                      5091.8(3) 
_cell_formula_units_Z             4 
_cell_measurement_temperature     100(2) 
_cell_measurement_reflns_used     90 
_cell_measurement_theta_min       2.54 
_cell_measurement_theta_max       28.34 
 
_exptl_crystal_description        block 
_exptl_crystal_colour             green 
_exptl_crystal_size_max           0.23 
_exptl_crystal_size_mid           0.20 
_exptl_crystal_size_min           0.10 
_exptl_crystal_density_meas       ? 
_exptl_crystal_density_diffrn     1.099 
_exptl_crystal_density_method     'not measured' 
_exptl_crystal_F_000              1806 
_exptl_absorpt_coefficient_mu     0.790 
_exptl_absorpt_correction_type    'Numerical' 
_exptl_absorpt_correction_T_min   0.9686 
_exptl_absorpt_correction_T_max   0.9922 
_exptl_absorpt_process_details    'Sadabs' 
 
_exptl_special_details 
; 
 No hydrogen bonding expected in this complex 
; 
 
_diffrn_ambient_temperature       100(2) 
_diffrn_radiation_wavelength      1.54178 
_diffrn_radiation_type            CuK\a 
_diffrn_radiation_source          'fine-focus sealed tube' 
_diffrn_radiation_monochromator   graphite 
_diffrn_measurement_device_type   'CCD area detector' 
_diffrn_measurement_method        'phi and omega scans' 
_diffrn_detector_area_resol_mean  ? 
_diffrn_reflns_number             31807 
_diffrn_reflns_av_R_equivalents   0.0399 
_diffrn_reflns_av_sigmaI/netI     0.0383 
_diffrn_reflns_limit_h_min        -22 
_diffrn_reflns_limit_h_max        23 
_diffrn_reflns_limit_k_min        -13 
_diffrn_reflns_limit_k_max        13 
_diffrn_reflns_limit_l_min        -27 
_diffrn_reflns_limit_l_max        28 
_diffrn_reflns_theta_min          3.80 
_diffrn_reflns_theta_max          70.06 
_reflns_number_total              9359 
_reflns_number_gt                 7210 
_reflns_threshold_expression      >2sigma(I) 
 
_computing_data_collection        'Bruker Duo' 
_computing_cell_refinement        'Bruker Duo' 
_computing_data_reduction         'Bruker Saint' 
_computing_structure_solution     'SHELXS-97 (Sheldrick, 2008)' 
_computing_structure_refinement   'SHELXL-97 (Sheldrick, 2008)' 
_computing_molecular_graphics     'Bruker Shelxtl' 
_computing_publication_material   'Bruker Shelxtl' 
 
_refine_special_details 
; 
 Refinement of F^2^ against ALL reflections.  The weighted R-factor wR and 
 goodness of fit S are based on F^2^, conventional R-factors R are based 
 on F, with F set to zero for negative F^2^. The threshold expression of 
 F^2^ > 2sigma(F^2^) is used only for calculating R-factors(gt) etc. and is 
 not relevant to the choice of reflections for refinement.  R-factors based 
 on F^2^ are statistically about twice as large as those based on F, and R- 
 factors based on ALL data will be even larger. 
; 
 
_refine_ls_structure_factor_coef  Fsqd  
_refine_ls_matrix_type            full 
_refine_ls_weighting_scheme       calc  
_refine_ls_weighting_details 
 'calc w=1/[\s^2^(Fo^2^)+(0.1457P)^2^+5.4908P] where P=(Fo^2^+2Fc^2^)/3' 
_atom_sites_solution_primary      direct 
_atom_sites_solution_secondary    difmap 
_atom_sites_solution_hydrogens    geom 
_refine_ls_hydrogen_treatment     constr 
_refine_ls_extinction_method      none 
_refine_ls_extinction_coef        ? 
_refine_ls_number_reflns          9359 
_refine_ls_number_parameters      516 
_refine_ls_number_restraints      6 
_refine_ls_R_factor_all           0.1020 
_refine_ls_R_factor_gt            0.0839 
_refine_ls_wR_factor_ref          0.2552 
_refine_ls_wR_factor_gt           0.2374 
_refine_ls_goodness_of_fit_ref    1.028 
_refine_ls_restrained_S_all       1.028 
_refine_ls_shift/su_max           0.001 
_refine_ls_shift/su_mean          0.000 
 
loop_ 
 _atom_site_label 
 _atom_site_type_symbol 
 _atom_site_fract_x 
 _atom_site_fract_y 
 _atom_site_fract_z 
 _atom_site_U_iso_or_equiv 
 _atom_site_adp_type 
 _atom_site_occupancy 
 _atom_site_symmetry_multiplicity 
 _atom_site_calc_flag 
 _atom_site_refinement_flags 
 _atom_site_disorder_assembly 
 _atom_site_disorder_group 
Al1 Al 0.26227(4) 0.44579(8) 0.38683(3) 0.0323(2) Uani 1 1 d . . . 
Na1 Na 0.33414(6) 0.22129(12) 0.32182(5) 0.0428(3) Uani 1 1 d . . . 
O1 O 0.24019(11) 0.3259(2) 0.34080(9) 0.0440(6) Uani 1 1 d . . . 
H1A H 0.1940 0.3091 0.3282 0.066 Uiso 1 1 d R . . 
O2 O 0.42650(11) 0.1212(2) 0.36653(9) 0.0446(5) Uani 1 1 d . . . 
O3 O 0.35432(15) 0.1940(3) 0.22258(10) 0.0609(7) Uani 1 1 d . . . 
O4 O 0.27552(19) 0.0495(3) 0.28598(14) 0.0772(9) Uani 1 1 d . . . 
O5 O 0.0652(8) 0.3172(18) 0.2576(9) 0.457(11) Uiso 1 1 d D . . 
N1 N 0.24597(13) 0.5980(3) 0.35203(10) 0.0396(6) Uani 1 1 d . . . 
N2 N 0.15813(12) 0.4716(3) 0.40518(10) 0.0408(7) Uani 1 1 d . . . 
N3 N 0.29280(12) 0.4264(2) 0.46447(10) 0.0360(6) Uani 1 1 d . . . 
N4 N 0.36296(12) 0.4371(2) 0.37395(10) 0.0327(5) Uani 1 1 d . . . 
C1 C 0.18175(17) 0.6440(3) 0.35825(13) 0.0464(8) Uani 1 1 d . . . 
H1 H 0.1702 0.7172 0.3438 0.056 Uiso 1 1 calc R . . 
C2 C 0.13310(16) 0.5786(3) 0.38692(13) 0.0446(8) Uani 1 1 d . . . 
C3 C 0.06262(18) 0.6117(4) 0.39637(15) 0.0583(11) Uani 1 1 d . . . 
H3 H 0.0459 0.6841 0.3846 0.070 Uiso 1 1 calc R . . 
C4 C 0.02015(18) 0.5370(5) 0.42266(16) 0.0663(13) Uani 1 1 d . . . 
H4 H -0.0258 0.5584 0.4294 0.080 Uiso 1 1 calc R . . 
C5 C 0.04514(18) 0.4274(4) 0.43985(15) 0.0595(11) Uani 1 1 d . . . 
H5 H 0.0161 0.3744 0.4571 0.071 Uiso 1 1 calc R . . 
C6 C 0.11415(16) 0.4004(4) 0.43038(13) 0.0493(9) Uani 1 1 d . . . 
H6 H 0.1311 0.3282 0.4423 0.059 Uiso 1 1 calc R . . 
C7 C 0.29176(17) 0.6585(3) 0.31574(14) 0.0419(7) Uani 1 1 d . . . 
C8 C 0.35120(18) 0.7166(3) 0.34041(15) 0.0456(8) Uani 1 1 d . . . 
C9 C 0.3968(2) 0.7710(3) 0.30378(17) 0.0554(9) Uani 1 1 d . . . 
H9 H 0.4362 0.8102 0.3194 0.066 Uiso 1 1 calc R . . 
C10 C 0.3841(2) 0.7673(4) 0.24512(19) 0.0620(11) Uani 1 1 d . . . 
H10 H 0.4151 0.8033 0.2214 0.074 Uiso 1 1 calc R . . 
C11 C 0.3256(2) 0.7104(4) 0.22116(17) 0.0593(10) Uani 1 1 d . . . 
H11 H 0.3174 0.7097 0.1814 0.071 Uiso 1 1 calc R . . 
C12 C 0.27805(19) 0.6534(3) 0.25576(14) 0.0488(8) Uani 1 1 d . . . 
C13 C 0.36447(19) 0.7254(3) 0.40523(15) 0.0481(8) Uani 1 1 d . . . 
H13 H 0.3454 0.6552 0.4222 0.058 Uiso 1 1 calc R . . 
C14 C 0.4424(2) 0.7337(4) 0.42540(18) 0.0580(10) Uani 1 1 d . . . 
H14A H 0.4469 0.7396 0.4674 0.070 Uiso 0.50 1 d PR . . 
H14B H 0.4629 0.8028 0.4084 0.070 Uiso 0.50 1 d PR . . 
H14C H 0.4674 0.6646 0.4131 0.070 Uiso 0.50 1 d PR . . 
H14D H 0.4712 0.7317 0.3918 0.070 Uiso 0.50 1 d PR . . 
H14E H 0.4552 0.6685 0.4508 0.070 Uiso 0.50 1 d PR . . 
H14F H 0.4507 0.8067 0.4462 0.070 Uiso 0.50 1 d PR . . 
C15 C 0.3240(2) 0.8298(4) 0.42792(18) 0.0579(10) Uani 1 1 d . . . 
H15A H 0.3328 0.8353 0.4697 0.069 Uiso 0.50 1 d PR . . 
H15B H 0.2734 0.8196 0.4186 0.069 Uiso 0.50 1 d PR . . 
H15C H 0.3401 0.9010 0.4099 0.069 Uiso 0.50 1 d PR . . 
H15D H 0.2981 0.8686 0.3957 0.069 Uiso 0.50 1 d PR . . 
H15E H 0.3575 0.8843 0.4469 0.069 Uiso 0.50 1 d PR . . 
H15F H 0.2908 0.8029 0.4556 0.069 Uiso 0.50 1 d PR . . 
C16 C 0.2160(2) 0.5887(4) 0.22750(15) 0.0614(11) Uani 1 1 d . . . 
H16A H 0.1903 0.5538 0.2584 0.074 Uiso 1 1 calc R . . 
C17 C 0.2379(3) 0.4927(8) 0.1903(3) 0.089(3) Uani 0.70 1 d P . . 
H17A H 0.1972 0.4610 0.1695 0.133 Uiso 1 1 calc R . . 
H17B H 0.2605 0.4334 0.2137 0.133 Uiso 1 1 calc R . . 
H17C H 0.2702 0.5216 0.1635 0.133 Uiso 1 1 calc R . . 
C18 C 0.1663(3) 0.6765(7) 0.1970(3) 0.085(2) Uani 0.70 1 d P . . 
H18A H 0.1303 0.6361 0.1743 0.128 Uiso 1 1 calc R . . 
H18B H 0.1926 0.7248 0.1724 0.128 Uiso 1 1 calc R . . 
H18C H 0.1450 0.7238 0.2251 0.128 Uiso 1 1 calc R . . 
C19 C 0.36668(15) 0.4194(3) 0.47390(12) 0.0368(7) Uani 1 1 d . . . 
H19 H 0.3881 0.4103 0.5106 0.044 Uiso 1 1 calc R . . 
C20 C 0.40475(15) 0.4265(3) 0.42700(12) 0.0337(6) Uani 1 1 d . . . 
C21 C 0.48047(15) 0.4267(3) 0.42501(13) 0.0380(7) Uani 1 1 d . . . 
H21 H 0.5083 0.4214 0.4592 0.046 Uiso 1 1 calc R . . 
C22 C 0.51176(16) 0.4343(3) 0.37497(14) 0.0394(7) Uani 1 1 d . . . 
H22 H 0.5607 0.4331 0.3745 0.047 Uiso 1 1 calc R . . 
C23 C 0.46915(16) 0.4442(3) 0.32200(13) 0.0394(7) Uani 1 1 d . . . 
H23 H 0.4899 0.4490 0.2869 0.047 Uiso 1 1 calc R . . 
C24 C 0.39775(15) 0.4466(3) 0.32438(12) 0.0350(6) Uani 1 1 d . . . 
H24 H 0.3708 0.4552 0.2900 0.042 Uiso 1 1 calc R . . 
C25 C 0.25245(15) 0.4014(3) 0.51227(11) 0.0388(7) Uani 1 1 d . . . 
C26 C 0.24346(17) 0.2865(3) 0.53002(13) 0.0446(8) Uani 1 1 d . . . 
C27 C 0.20026(19) 0.2643(4) 0.57566(14) 0.0537(9) Uani 1 1 d . . . 
H27 H 0.1943 0.1884 0.5878 0.064 Uiso 1 1 calc R . . 
C28 C 0.16666(18) 0.3523(4) 0.60263(14) 0.0548(10) Uani 1 1 d . . . 
H28 H 0.1376 0.3358 0.6324 0.066 Uiso 1 1 calc R . . 
C29 C 0.17598(17) 0.4649(4) 0.58558(13) 0.0479(9) Uani 1 1 d . . . 
H29 H 0.1533 0.5242 0.6043 0.058 Uiso 1 1 calc R . . 
C30 C 0.21888(15) 0.4924(3) 0.54072(12) 0.0410(8) Uani 1 1 d . . . 
C31 C 0.27740(19) 0.1858(3) 0.50052(14) 0.0498(9) Uani 1 1 d . . . 
H31 H 0.3000 0.2164 0.4669 0.060 Uiso 1 1 calc R . . 
C32 C 0.2231(3) 0.0956(5) 0.4792(2) 0.0785(13) Uani 1 1 d . . . 
H32A H 0.2471 0.0320 0.4605 0.094 Uiso 0.50 1 d PR . . 
H32B H 0.1890 0.1319 0.4515 0.094 Uiso 0.50 1 d PR . . 
H32C H 0.1983 0.0651 0.5117 0.094 Uiso 0.50 1 d PR . . 
H32D H 0.1758 0.1206 0.4886 0.094 Uiso 0.50 1 d PR . . 
H32E H 0.2339 0.0208 0.4976 0.094 Uiso 0.50 1 d PR . . 
H32F H 0.2247 0.0876 0.4374 0.094 Uiso 0.50 1 d PR . . 
C33 C 0.3347(2) 0.1286(4) 0.53995(17) 0.0685(12) Uani 1 1 d . . . 
H33A H 0.3558 0.0636 0.5200 0.082 Uiso 0.50 1 d PR . . 
H33B H 0.3140 0.1004 0.5748 0.082 Uiso 0.50 1 d PR . . 
H33C H 0.3713 0.1861 0.5503 0.082 Uiso 0.50 1 d PR . . 
H33D H 0.3383 0.1698 0.5768 0.082 Uiso 0.50 1 d PR . . 
H33E H 0.3800 0.1330 0.5219 0.082 Uiso 0.50 1 d PR . . 
H33F H 0.3228 0.0472 0.5464 0.082 Uiso 0.50 1 d PR . . 
C34 C 0.23203(16) 0.6176(3) 0.52532(13) 0.0443(8) Uani 1 1 d . . . 
H34A H 0.2439 0.6194 0.4849 0.053 Uiso 1 1 calc R . . 
C35 C 0.1689(2) 0.6975(4) 0.53102(16) 0.0575(10) Uani 1 1 d . . . 
H35A H 0.1812 0.7768 0.5203 0.069 Uiso 0.50 1 d PR . . 
H35B H 0.1551 0.6967 0.5709 0.069 Uiso 0.50 1 d PR . . 
H35C H 0.1295 0.6700 0.5055 0.069 Uiso 0.50 1 d PR . . 
H35D H 0.1294 0.6521 0.5441 0.069 Uiso 0.50 1 d PR . . 
H35E H 0.1555 0.7324 0.4935 0.069 Uiso 0.50 1 d PR . . 
H35F H 0.1811 0.7589 0.5590 0.069 Uiso 0.50 1 d PR . . 
C36 C 0.2963(2) 0.6625(4) 0.56144(17) 0.0600(10) Uani 1 1 d . . . 
H36A H 0.3047 0.7435 0.5513 0.072 Uiso 0.50 1 d PR . . 
H36B H 0.3377 0.6159 0.5535 0.072 Uiso 0.50 1 d PR . . 
H36C H 0.2874 0.6571 0.6024 0.072 Uiso 0.50 1 d PR . . 
H36D H 0.3152 0.6008 0.5868 0.072 Uiso 0.50 1 d PR . . 
H36E H 0.2822 0.7285 0.5846 0.072 Uiso 0.50 1 d PR . . 
H36F H 0.3325 0.6872 0.5358 0.072 Uiso 0.50 1 d PR . . 
C37 C 0.4757(2) 0.0820(4) 0.32677(16) 0.0550(9) Uani 1 1 d . . . 
H37A H 0.4876 0.1445 0.3012 0.066 Uiso 1 1 calc R . . 
H37B H 0.4557 0.0186 0.3038 0.066 Uiso 1 1 calc R . . 
C38 C 0.5405(2) 0.0420(4) 0.36168(19) 0.0619(11) Uani 1 1 d . . . 
H38A H 0.5378 -0.0398 0.3709 0.074 Uiso 1 1 calc R . . 
H38B H 0.5830 0.0564 0.3417 0.074 Uiso 1 1 calc R . . 
C39 C 0.5379(2) 0.1155(4) 0.4143(2) 0.0765(14) Uani 1 1 d . . . 
H39A H 0.5573 0.1920 0.4081 0.092 Uiso 1 1 calc R . . 
H39B H 0.5635 0.0797 0.4470 0.092 Uiso 1 1 calc R . . 
C40 C 0.4595(2) 0.1218(4) 0.42327(15) 0.0528(9) Uani 1 1 d . . . 
H40A H 0.4445 0.0556 0.4451 0.063 Uiso 1 1 calc R . . 
H40B H 0.4481 0.1922 0.4435 0.063 Uiso 1 1 calc R . . 
C41 C 0.2235(4) -0.0061(6) 0.3135(2) 0.109(2) Uani 1 1 d . . . 
H41A H 0.2341 -0.0024 0.3551 0.131 Uiso 0.50 1 d PR . . 
H41B H 0.2225 -0.0873 0.3010 0.131 Uiso 0.50 1 d PR . . 
H41C H 0.1775 0.0296 0.3039 0.131 Uiso 0.50 1 d PR . . 
H41D H 0.1886 -0.0376 0.2849 0.131 Uiso 0.50 1 d PR . . 
H41E H 0.2003 0.0472 0.3390 0.131 Uiso 0.50 1 d PR . . 
H41F H 0.2453 -0.0697 0.3361 0.131 Uiso 0.50 1 d PR . . 
C42 C 0.2661(3) 0.0492(5) 0.22683(19) 0.0759(13) Uani 1 1 d . . . 
H42A H 0.2249 0.0955 0.2156 0.091 Uiso 1 1 calc R . . 
H42B H 0.2568 -0.0295 0.2139 0.091 Uiso 1 1 calc R . . 
C43 C 0.3250(3) 0.0932(6) 0.1982(2) 0.0908(18) Uani 1 1 d . . . 
H43A H 0.3612 0.0338 0.1985 0.109 Uiso 1 1 calc R . . 
H43B H 0.3101 0.1087 0.1584 0.109 Uiso 1 1 calc R . . 
C44 C 0.4091(2) 0.2414(5) 0.19233(17) 0.0707(12) Uani 1 1 d . . . 
H44A H 0.4268 0.3118 0.2119 0.085 Uiso 0.50 1 d PR . . 
H44B H 0.3915 0.2606 0.1531 0.085 Uiso 0.50 1 d PR . . 
H44C H 0.4474 0.1848 0.1910 0.085 Uiso 0.50 1 d PR . . 
H44D H 0.4170 0.1930 0.1587 0.085 Uiso 0.50 1 d PR . . 
H44E H 0.4523 0.2442 0.2175 0.085 Uiso 0.50 1 d PR . . 
H44F H 0.3963 0.3200 0.1796 0.085 Uiso 0.50 1 d PR . . 
C45 C -0.0196(15) 0.5004(17) 0.2473(12) 0.396(14) Uiso 1 1 d D . . 
C46 C 0.0012(12) 0.3784(18) 0.2662(11) 0.368(12) Uiso 1 1 d D . . 
C47 C 0.0513(11) 0.2046(16) 0.2800(9) 0.324(10) Uiso 1 1 d D . . 
C49 C 0.0153(18) 0.459(3) 0.0620(12) 0.444(17) Uiso 1 1 d D . . 
C50 C 0.0138(10) 0.3915(18) 0.0060(12) 0.273(7) Uiso 1 1 d D . . 
C51 C 0.0016(16) 0.423(3) -0.0573(11) 0.414(15) Uiso 1 1 d D . . 
 
loop_ 
 _atom_site_aniso_label 
 _atom_site_aniso_U_11 
 _atom_site_aniso_U_22 
 _atom_site_aniso_U_33 
 _atom_site_aniso_U_23 
 _atom_site_aniso_U_13 
 _atom_site_aniso_U_12 
Al1 0.0249(4) 0.0532(6) 0.0189(4) -0.0018(3) 0.0017(3) 0.0044(4) 
Na1 0.0405(7) 0.0562(8) 0.0316(6) -0.0045(5) 0.0008(5) 0.0060(6) 
O1 0.0301(10) 0.0664(15) 0.0352(11) -0.0111(10) 0.0008(8) -0.0003(10) 
O2 0.0375(11) 0.0609(15) 0.0353(11) -0.0028(10) 0.0013(9) 0.0056(11) 
O3 0.0683(17) 0.0774(19) 0.0374(13) -0.0095(12) 0.0069(12) 0.0020(15) 
O4 0.091(2) 0.079(2) 0.0618(18) -0.0148(15) -0.0011(16) -0.0176(18) 
N1 0.0322(12) 0.0566(17) 0.0300(12) 0.0036(11) 0.0033(10) 0.0076(12) 
N2 0.0268(12) 0.0746(19) 0.0210(11) -0.0003(12) 0.0022(9) 0.0059(13) 
N3 0.0269(12) 0.0601(16) 0.0210(11) 0.0000(11) 0.0011(9) 0.0073(11) 
N4 0.0279(12) 0.0474(14) 0.0230(11) -0.0017(10) 0.0026(9) 0.0048(10) 
C1 0.0367(16) 0.069(2) 0.0340(16) 0.0029(15) 0.0026(13) 0.0195(16) 
C2 0.0319(15) 0.074(2) 0.0277(15) -0.0018(15) -0.0015(12) 0.0140(16) 
C3 0.0349(17) 0.102(3) 0.0381(18) -0.0045(19) 0.0016(14) 0.022(2) 
C4 0.0270(16) 0.130(4) 0.0418(19) -0.004(2) 0.0040(14) 0.015(2) 
C5 0.0291(16) 0.113(4) 0.0362(18) 0.002(2) 0.0044(13) 0.000(2) 
C6 0.0318(15) 0.087(3) 0.0285(15) 0.0023(16) 0.0016(12) 0.0003(17) 
C7 0.0397(16) 0.0481(18) 0.0390(16) 0.0084(14) 0.0111(13) 0.0112(14) 
C8 0.0431(17) 0.0457(19) 0.0485(19) 0.0026(15) 0.0082(15) 0.0076(15) 
C9 0.055(2) 0.050(2) 0.063(2) 0.0064(18) 0.0158(18) 0.0005(17) 
C10 0.062(2) 0.057(2) 0.069(3) 0.016(2) 0.021(2) 0.002(2) 
C11 0.071(3) 0.065(2) 0.043(2) 0.0197(18) 0.0166(18) 0.019(2) 
C12 0.0483(19) 0.061(2) 0.0379(17) 0.0114(16) 0.0068(14) 0.0147(17) 
C13 0.0466(19) 0.0469(19) 0.051(2) -0.0031(15) 0.0048(15) 0.0027(16) 
C14 0.051(2) 0.059(2) 0.065(2) -0.0003(19) 0.0001(18) -0.0002(18) 
C15 0.056(2) 0.056(2) 0.061(2) -0.0140(19) 0.0067(18) 0.0054(19) 
C16 0.052(2) 0.100(3) 0.0321(17) 0.0133(19) -0.0010(15) 0.006(2) 
C17 0.048(3) 0.149(7) 0.068(4) -0.072(5) -0.001(3) -0.005(4) 
C18 0.048(3) 0.123(6) 0.080(4) 0.045(4) -0.032(3) 0.004(4) 
C19 0.0314(14) 0.0553(19) 0.0232(13) -0.0037(12) -0.0033(11) 0.0068(13) 
C20 0.0284(14) 0.0456(17) 0.0266(14) -0.0042(12) -0.0016(11) 0.0053(12) 
C21 0.0283(14) 0.0516(18) 0.0336(15) -0.0053(13) -0.0022(11) 0.0049(13) 
C22 0.0265(14) 0.0498(18) 0.0421(17) -0.0037(14) 0.0045(12) 0.0032(13) 
C23 0.0342(15) 0.0535(19) 0.0316(15) 0.0006(13) 0.0099(12) 0.0038(14) 
C24 0.0333(14) 0.0482(17) 0.0237(13) 0.0001(12) 0.0030(11) 0.0049(13) 
C25 0.0292(14) 0.069(2) 0.0184(13) -0.0025(13) -0.0012(10) 0.0102(14) 
C26 0.0387(16) 0.071(2) 0.0238(14) 0.0068(14) 0.0008(12) 0.0091(16) 
C27 0.0478(19) 0.083(3) 0.0313(16) 0.0134(17) 0.0073(14) 0.0106(19) 
C28 0.0413(18) 0.096(3) 0.0278(15) 0.0101(18) 0.0091(13) 0.0118(19) 
C29 0.0352(16) 0.085(3) 0.0234(14) -0.0088(16) 0.0034(12) 0.0134(17) 
C30 0.0274(14) 0.075(2) 0.0203(13) -0.0054(14) -0.0029(11) 0.0079(15) 
C31 0.0515(19) 0.064(2) 0.0344(17) 0.0101(16) 0.0063(14) 0.0148(18) 
C32 0.068(3) 0.078(3) 0.089(3) -0.015(3) 0.000(2) 0.020(3) 
C33 0.068(3) 0.092(3) 0.046(2) 0.017(2) 0.0092(18) 0.036(2) 
C34 0.0365(16) 0.068(2) 0.0284(15) -0.0131(15) -0.0009(12) 0.0079(16) 
C35 0.052(2) 0.079(3) 0.0408(18) -0.0129(18) 0.0007(15) 0.020(2) 
C36 0.049(2) 0.082(3) 0.048(2) -0.018(2) -0.0097(16) 0.003(2) 
C37 0.057(2) 0.069(2) 0.0408(19) 0.0063(17) 0.0137(16) 0.0125(19) 
C38 0.048(2) 0.066(3) 0.073(3) 0.012(2) 0.0128(19) 0.0093(19) 
C39 0.060(3) 0.061(3) 0.104(4) -0.016(2) -0.038(2) 0.014(2) 
C40 0.067(2) 0.054(2) 0.0367(17) -0.0033(15) -0.0039(16) 0.0100(18) 
C41 0.133(5) 0.113(5) 0.075(3) 0.043(3) -0.034(3) -0.056(4) 
C42 0.075(3) 0.094(4) 0.056(3) -0.010(2) -0.016(2) -0.006(3) 
C43 0.068(3) 0.146(5) 0.058(3) -0.054(3) 0.005(2) -0.021(3) 
C44 0.073(3) 0.101(4) 0.040(2) -0.001(2) 0.0134(18) -0.003(3) 
 
_geom_special_details 
; 
 All esds (except the esd in the dihedral angle between two l.s. planes) 
 are estimated using the full covariance matrix.  The cell esds are taken 
 into account individually in the estimation of esds in distances, angles 
 and torsion angles; correlations between esds in cell parameters are only 
 used when they are defined by crystal symmetry.  An approximate (isotropic) 
 treatment of cell esds is used for estimating esds involving l.s. planes. 
; 
 
loop_ 
 _geom_bond_atom_site_label_1 
 _geom_bond_atom_site_label_2 
 _geom_bond_distance 
 _geom_bond_site_symmetry_2 
 _geom_bond_publ_flag 
Al1 O1 1.784(2) . ? 
Al1 N3 1.878(2) . ? 
Al1 N1 1.951(3) . ? 
Al1 N4 1.956(2) . ? 
Al1 N2 2.070(2) . ? 
Al1 Na1 3.3333(15) . ? 
Na1 O1 2.220(2) . ? 
Na1 O2 2.297(3) . ? 
Na1 O3 2.385(3) . ? 
Na1 O4 2.399(3) . ? 
Na1 N4 2.810(3) . ? 
Na1 C24 2.865(3) . ? 
Na1 C37 3.129(4) . ? 
O1 H1A 0.9284 . ? 
O2 C40 1.427(4) . ? 
O2 C37 1.428(4) . ? 
O3 C43 1.395(6) . ? 
O3 C44 1.402(5) . ? 
O4 C41 1.368(6) . ? 
O4 C42 1.378(5) . ? 
O5 C46 1.4298(10) . ? 
O5 C47 1.4299(10) . ? 
N1 C1 1.346(4) . ? 
N1 C7 1.430(4) . ? 
N2 C6 1.333(4) . ? 
N2 C2 1.380(5) . ? 
N3 C19 1.409(4) . ? 
N3 C25 1.418(4) . ? 
N4 C24 1.368(4) . ? 
N4 C20 1.433(3) . ? 
C1 C2 1.394(5) . ? 
C1 H1 0.9300 . ? 
C2 C3 1.422(4) . ? 
C3 C4 1.352(6) . ? 
C3 H3 0.9300 . ? 
C4 C5 1.401(7) . ? 
C4 H4 0.9300 . ? 
C5 C6 1.378(5) . ? 
C5 H5 0.9300 . ? 
C6 H6 0.9300 . ? 
C7 C8 1.406(5) . ? 
C7 C12 1.406(5) . ? 
C8 C9 1.400(5) . ? 
C8 C13 1.518(5) . ? 
C9 C10 1.373(6) . ? 
C9 H9 0.9300 . ? 
C10 C11 1.379(6) . ? 
C10 H10 0.9300 . ? 
C11 C12 1.409(5) . ? 
C11 H11 0.9300 . ? 
C12 C16 1.512(6) . ? 
C13 C14 1.529(5) . ? 
C13 C15 1.540(5) . ? 
C13 H13 0.9800 . ? 
C14 H14A 0.9792 . ? 
C14 H14B 0.9806 . ? 
C14 H14C 0.9791 . ? 
C14 H14D 0.9806 . ? 
C14 H14E 0.9789 . ? 
C14 H14F 0.9799 . ? 
C15 H15A 0.9791 . ? 
C15 H15B 0.9800 . ? 
C15 H15C 0.9800 . ? 
C15 H15D 0.9802 . ? 
C15 H15E 0.9809 . ? 
C15 H15F 0.9787 . ? 
C16 C17 1.481(7) . ? 
C16 C18 1.530(7) . ? 
C16 H16A 0.9800 . ? 
C17 H17A 0.9600 . ? 
C17 H17B 0.9600 . ? 
C17 H17C 0.9600 . ? 
C18 H18A 0.9600 . ? 
C18 H18B 0.9600 . ? 
C18 H18C 0.9600 . ? 
C19 C20 1.348(4) . ? 
C19 H19 0.9300 . ? 
C20 C21 1.442(4) . ? 
C21 C22 1.342(4) . ? 
C21 H21 0.9300 . ? 
C22 C23 1.438(4) . ? 
C22 H22 0.9300 . ? 
C23 C24 1.361(4) . ? 
C23 H23 0.9300 . ? 
C24 H24 0.9300 . ? 
C25 C26 1.402(5) . ? 
C25 C30 1.414(4) . ? 
C26 C27 1.404(4) . ? 
C26 C31 1.513(5) . ? 
C27 C28 1.371(6) . ? 
C27 H27 0.9300 . ? 
C28 C29 1.373(6) . ? 
C28 H28 0.9300 . ? 
C29 C30 1.399(4) . ? 
C29 H29 0.9300 . ? 
C30 C34 1.513(5) . ? 
C31 C32 1.527(6) . ? 
C31 C33 1.530(5) . ? 
C31 H31 0.9800 . ? 
C32 H32A 0.9786 . ? 
C32 H32B 0.9802 . ? 
C32 H32C 0.9804 . ? 
C32 H32D 0.9811 . ? 
C32 H32E 0.9797 . ? 
C32 H32F 0.9796 . ? 
C33 H33A 0.9801 . ? 
C33 H33B 0.9787 . ? 
C33 H33C 0.9806 . ? 
C33 H33D 0.9805 . ? 
C33 H33E 0.9808 . ? 
C33 H33F 0.9798 . ? 
C34 C35 1.525(5) . ? 
C34 C36 1.530(5) . ? 
C34 H34A 0.9800 . ? 
C35 H35A 0.9802 . ? 
C35 H35B 0.9802 . ? 
C35 H35C 0.9795 . ? 
C35 H35D 0.9785 . ? 
C35 H35E 0.9807 . ? 
C35 H35F 0.9812 . ? 
C36 H36A 0.9796 . ? 
C36 H36B 0.9804 . ? 
C36 H36C 0.9806 . ? 
C36 H36D 0.9801 . ? 
C36 H36E 0.9793 . ? 
C36 H36F 0.9791 . ? 
C37 C38 1.506(6) . ? 
C37 H37A 0.9700 . ? 
C37 H37B 0.9700 . ? 
C38 C39 1.494(6) . ? 
C38 H38A 0.9700 . ? 
C38 H38B 0.9700 . ? 
C39 C40 1.518(6) . ? 
C39 H39A 0.9700 . ? 
C39 H39B 0.9700 . ? 
C40 H40A 0.9700 . ? 
C40 H40B 0.9700 . ? 
C41 H41A 0.9798 . ? 
C41 H41B 0.9809 . ? 
C41 H41C 0.9792 . ? 
C41 H41D 0.9808 . ? 
C41 H41E 0.9789 . ? 
C41 H41F 0.9813 . ? 
C42 C43 1.429(7) . ? 
C42 H42A 0.9700 . ? 
C42 H42B 0.9700 . ? 
C43 H43A 0.9700 . ? 
C43 H43B 0.9700 . ? 
C44 H44A 0.9808 . ? 
C44 H44B 0.9785 . ? 
C44 H44C 0.9795 . ? 
C44 H44D 0.9801 . ? 
C44 H44E 0.9798 . ? 
C44 H44F 0.9800 . ? 
C45 C46 1.5203(10) . ? 
C49 C51 1.40(4) 3_565 ? 
C49 C50 1.5200(10) . ? 
C50 C51 1.5200(10) . ? 
C51 C49 1.40(4) 3_565 ? 
 
loop_ 
 _geom_angle_atom_site_label_1 
 _geom_angle_atom_site_label_2 
 _geom_angle_atom_site_label_3 
 _geom_angle 
 _geom_angle_site_symmetry_1 
 _geom_angle_site_symmetry_3 
 _geom_angle_publ_flag 
O1 Al1 N3 122.22(13) . . ? 
O1 Al1 N1 115.03(12) . . ? 
N3 Al1 N1 122.62(12) . . ? 
O1 Al1 N4 93.72(10) . . ? 
N3 Al1 N4 83.86(10) . . ? 
N1 Al1 N4 96.58(11) . . ? 
O1 Al1 N2 92.44(11) . . ? 
N3 Al1 N2 93.58(10) . . ? 
N1 Al1 N2 79.99(11) . . ? 
N4 Al1 N2 173.77(12) . . ? 
O1 Al1 Na1 38.07(7) . . ? 
N3 Al1 Na1 103.47(9) . . ? 
N1 Al1 Na1 124.76(8) . . ? 
N4 Al1 Na1 57.31(8) . . ? 
N2 Al1 Na1 128.91(9) . . ? 
O1 Na1 O2 141.64(9) . . ? 
O1 Na1 O3 116.26(10) . . ? 
O2 Na1 O3 102.10(10) . . ? 
O1 Na1 O4 99.01(12) . . ? 
O2 Na1 O4 93.91(12) . . ? 
O3 Na1 O4 69.65(11) . . ? 
O1 Na1 N4 64.56(8) . . ? 
O2 Na1 N4 97.24(9) . . ? 
O3 Na1 N4 119.80(10) . . ? 
O4 Na1 N4 163.15(11) . . ? 
O1 Na1 C24 81.13(10) . . ? 
O2 Na1 C24 97.86(10) . . ? 
O3 Na1 C24 92.75(10) . . ? 
O4 Na1 C24 160.61(11) . . ? 
N4 Na1 C24 27.87(7) . . ? 
O1 Na1 C37 166.16(10) . . ? 
O2 Na1 C37 25.00(8) . . ? 
O3 Na1 C37 77.29(10) . . ? 
O4 Na1 C37 88.18(13) . . ? 
N4 Na1 C37 107.13(10) . . ? 
C24 Na1 C37 96.01(11) . . ? 
O1 Na1 Al1 29.71(6) . . ? 
O2 Na1 Al1 120.49(7) . . ? 
O3 Na1 Al1 129.53(9) . . ? 
O4 Na1 Al1 127.29(10) . . ? 
N4 Na1 Al1 35.87(5) . . ? 
C24 Na1 Al1 57.95(6) . . ? 
C37 Na1 Al1 139.19(9) . . ? 
Al1 O1 Na1 112.22(11) . . ? 
Al1 O1 H1A 122.4 . . ? 
Na1 O1 H1A 125.4 . . ? 
C40 O2 C37 109.4(3) . . ? 
C40 O2 Na1 134.3(2) . . ? 
C37 O2 Na1 112.2(2) . . ? 
C43 O3 C44 114.3(3) . . ? 
C43 O3 Na1 114.8(3) . . ? 
C44 O3 Na1 127.0(2) . . ? 
C41 O4 C42 114.3(4) . . ? 
C41 O4 Na1 123.9(4) . . ? 
C42 O4 Na1 112.3(3) . . ?  
C1 N1 C7 117.3(3) . . ? 
C1 N1 Al1 115.6(2) . . ? 
C7 N1 Al1 126.7(2) . . ? 
C6 N2 C2 118.2(3) . . ? 
C6 N2 Al1 129.4(3) . . ? 
C2 N2 Al1 112.4(2) . . ? 
C19 N3 C25 116.5(2) . . ? 
C19 N3 Al1 113.81(18) . . ? 
C25 N3 Al1 128.98(19) . . ? 
C24 N4 C20 117.6(2) . . ? 
C24 N4 Al1 130.7(2) . . ? 
C20 N4 Al1 111.62(17) . . ? 
C24 N4 Na1 78.34(17) . . ? 
C20 N4 Na1 112.31(18) . . ? 
Al1 N4 Na1 86.82(9) . . ? 
N1 C1 C2 118.0(3) . . ? 
N1 C1 H1 121.0 . . ? 
C2 C1 H1 121.0 . . ? 
N2 C2 C1 113.9(3) . . ? 
N2 C2 C3 120.2(3) . . ? 
C1 C2 C3 125.9(4) . . ? 
C4 C3 C2 119.4(4) . . ? 
C4 C3 H3 120.3 . . ? 
C2 C3 H3 120.3 . . ? 
C3 C4 C5 120.3(3) . . ? 
C3 C4 H4 119.9 . . ? 
C5 C4 H4 119.9 . . ? 
C6 C5 C4 117.8(4) . . ? 
C6 C5 H5 121.1 . . ? 
C4 C5 H5 121.1 . . ? 
N2 C6 C5 124.0(4) . . ? 
N2 C6 H6 118.0 . . ? 
C5 C6 H6 118.0 . . ? 
C8 C7 C12 121.5(3) . . ? 
C8 C7 N1 119.6(3) . . ? 
C12 C7 N1 118.9(3) . . ? 
C9 C8 C7 118.4(3) . . ? 
C9 C8 C13 120.2(3) . . ? 
C7 C8 C13 121.3(3) . . ? 
C10 C9 C8 120.9(4) . . ? 
C10 C9 H9 119.6 . . ? 
C8 C9 H9 119.6 . . ? 
C9 C10 C11 120.4(4) . . ? 
C9 C10 H10 119.8 . . ? 
C11 C10 H10 119.8 . . ? 
C10 C11 C12 121.3(4) . . ? 
C10 C11 H11 119.3 . . ? 
C12 C11 H11 119.3 . . ? 
C7 C12 C11 117.5(4) . . ? 
C7 C12 C16 123.1(3) . . ? 
C11 C12 C16 119.5(3) . . ? 
C8 C13 C14 114.2(3) . . ? 
C8 C13 C15 109.6(3) . . ? 
C14 C13 C15 109.9(3) . . ? 
C8 C13 H13 107.6 . . ? 
C14 C13 H13 107.6 . . ? 
C15 C13 H13 107.6 . . ? 
C13 C14 H14A 109.6 . . ? 
C13 C14 H14B 109.1 . . ? 
H14A C14 H14B 109.5 . . ? 
C13 C14 H14C 109.7 . . ? 
H14A C14 H14C 109.4 . . ? 
H14B C14 H14C 109.5 . . ? 
C13 C14 H14D 109.3 . . ? 
H14A C14 H14D 141.1 . . ? 
H14B C14 H14D 56.2 . . ? 
H14C C14 H14D 56.3 . . ? 
C13 C14 H14E 109.8 . . ? 
H14A C14 H14E 56.3 . . ? 
H14B C14 H14E 141.1 . . ? 
H14C C14 H14E 56.2 . . ? 
H14D C14 H14E 109.5 . . ? 
C13 C14 H14F 109.3 . . ? 
H14A C14 H14F 56.2 . . ? 
H14B C14 H14F 56.3 . . ? 
H14C C14 H14F 141.0 . . ? 
H14D C14 H14F 109.5 . . ? 
H14E C14 H14F 109.6 . . ? 
C13 C15 H15A 109.4 . . ? 
C13 C15 H15B 109.5 . . ? 
H15A C15 H15B 109.6 . . ? 
C13 C15 H15C 109.5 . . ? 
H15A C15 H15C 109.4 . . ? 
H15B C15 H15C 109.4 . . ? 
C13 C15 H15D 109.5 . . ? 
H15A C15 H15D 141.1 . . ? 
H15B C15 H15D 56.2 . . ? 
H15C C15 H15D 56.2 . . ? 
C13 C15 H15E 109.4 . . ? 
H15A C15 H15E 56.2 . . ? 
H15B C15 H15E 141.1 . . ? 
H15C C15 H15E 56.3 . . ? 
H15D C15 H15E 109.5 . . ? 
C13 C15 H15F 109.4 . . ? 
H15A C15 H15F 56.3 . . ? 
H15B C15 H15F 56.3 . . ? 
H15C C15 H15F 141.0 . . ? 
H15D C15 H15F 109.6 . . ? 
H15E C15 H15F 109.4 . . ? 
C17 C16 C12 112.6(4) . . ? 
C17 C16 C18 114.2(5) . . ? 
C12 C16 C18 108.5(4) . . ? 
C17 C16 H16A 107.0 . . ? 
C12 C16 H16A 107.0 . . ? 
C18 C16 H16A 107.0 . . ? 
C16 C17 H17A 109.5 . . ? 
C16 C17 H17B 109.5 . . ? 
H17A C17 H17B 109.5 . . ? 
C16 C17 H17C 109.5 . . ? 
H17A C17 H17C 109.5 . . ? 
H17B C17 H17C 109.5 . . ? 
C16 C18 H18A 109.5 . . ? 
C16 C18 H18B 109.5 . . ? 
H18A C18 H18B 109.5 . . ? 
C16 C18 H18C 109.5 . . ? 
H18A C18 H18C 109.5 . . ? 
H18B C18 H18C 109.5 . . ? 
C20 C19 N3 116.6(3) . . ? 
C20 C19 H19 121.7 . . ? 
N3 C19 H19 121.7 . . ? 
C19 C20 N4 114.0(2) . . ? 
C19 C20 C21 127.7(3) . . ? 
N4 C20 C21 118.3(2) . . ? 
C22 C21 C20 121.5(3) . . ? 
C22 C21 H21 119.2 . . ? 
C20 C21 H21 119.2 . . ? 
C21 C22 C23 119.6(3) . . ? 
C21 C22 H22 120.2 . . ? 
C23 C22 H22 120.2 . . ? 
C24 C23 C22 118.5(3) . . ? 
C24 C23 H23 120.7 . . ? 
C22 C23 H23 120.7 . . ? 
C23 C24 N4 124.5(3) . . ? 
C23 C24 Na1 113.7(2) . . ? 
N4 C24 Na1 73.79(17) . . ? 
C23 C24 H24 117.8 . . ? 
N4 C24 H24 117.8 . . ? 
Na1 C24 H24 82.5 . . ? 
C26 C25 C30 119.9(3) . . ? 
C26 C25 N3 120.3(3) . . ? 
C30 C25 N3 119.8(3) . . ? 
C25 C26 C27 118.8(3) . . ? 
C25 C26 C31 122.0(3) . . ? 
C27 C26 C31 119.2(3) . . ? 
C28 C27 C26 121.4(4) . . ? 
C28 C27 H27 119.3 . . ? 
C26 C27 H27 119.3 . . ? 
C27 C28 C29 119.8(3) . . ? 
C27 C28 H28 120.1 . . ? 
C29 C28 H28 120.1 . . ? 
C28 C29 C30 121.4(3) . . ? 
C28 C29 H29 119.3 . . ? 
C30 C29 H29 119.3 . . ? 
C29 C30 C25 118.7(3) . . ? 
C29 C30 C34 120.3(3) . . ? 
C25 C30 C34 120.9(3) . . ? 
C26 C31 C32 111.9(3) . . ? 
C26 C31 C33 111.5(3) . . ? 
C32 C31 C33 110.0(4) . . ? 
C26 C31 H31 107.8 . . ? 
C32 C31 H31 107.8 . . ? 
C33 C31 H31 107.8 . . ? 
C31 C32 H32A 109.4 . . ? 
C31 C32 H32B 109.2 . . ? 
H32A C32 H32B 109.5 . . ? 
C31 C32 H32C 109.9 . . ? 
H32A C32 H32C 109.4 . . ? 
H32B C32 H32C 109.4 . . ? 
C31 C32 H32D 109.7 . . ? 
H32A C32 H32D 140.9 . . ? 
H32B C32 H32D 56.2 . . ? 
H32C C32 H32D 56.2 . . ? 
C31 C32 H32E 109.8 . . ? 
H32A C32 H32E 56.2 . . ? 
H32B C32 H32E 141.0 . . ? 
H32C C32 H32E 56.2 . . ? 
H32D C32 H32E 109.4 . . ? 
C31 C32 H32F 109.0 . . ? 
H32A C32 H32F 56.3 . . ? 
H32B C32 H32F 56.3 . . ? 
H32C C32 H32F 141.1 . . ? 
H32D C32 H32F 109.4 . . ? 
H32E C32 H32F 109.5 . . ? 
C31 C33 H33A 110.1 . . ? 
C31 C33 H33B 109.5 . . ? 
H33A C33 H33B 109.5 . . ? 
C31 C33 H33C 108.9 . . ? 
H33A C33 H33C 109.3 . . ? 
H33B C33 H33C 109.5 . . ? 
C31 C33 H33D 109.0 . . ? 
H33A C33 H33D 140.9 . . ? 
H33B C33 H33D 56.3 . . ? 
H33C C33 H33D 56.3 . . ? 
C31 C33 H33E 109.4 . . ? 
H33A C33 H33E 56.2 . . ? 
H33B C33 H33E 141.1 . . ? 
H33C C33 H33E 56.2 . . ? 
H33D C33 H33E 109.4 . . ? 
C31 C33 H33F 110.1 . . ? 
H33A C33 H33F 56.2 . . ? 
H33B C33 H33F 56.3 . . ? 
H33C C33 H33F 141.0 . . ? 
H33D C33 H33F 109.6 . . ? 
H33E C33 H33F 109.4 . . ? 
C30 C34 C35 114.5(3) . . ? 
C30 C34 C36 109.3(3) . . ? 
C35 C34 C36 110.7(3) . . ? 
C30 C34 H34A 107.3 . . ? 
C35 C34 H34A 107.3 . . ? 
C36 C34 H34A 107.3 . . ? 
C34 C35 H35A 110.0 . . ? 
C34 C35 H35B 109.4 . . ? 
H35A C35 H35B 109.3 . . ? 
C34 C35 H35C 109.2 . . ? 
H35A C35 H35C 109.5 . . ? 
H35B C35 H35C 109.4 . . ? 
C34 C35 H35D 109.0 . . ? 
H35A C35 H35D 141.0 . . ? 
H35B C35 H35D 56.3 . . ? 
H35C C35 H35D 56.2 . . ? 
C34 C35 H35E 109.5 . . ? 
H35A C35 H35E 56.2 . . ? 
H35B C35 H35E 141.0 . . ? 
H35C C35 H35E 56.4 . . ? 
H35D C35 H35E 109.5 . . ? 
C34 C35 H35F 109.8 . . ? 
H35A C35 H35F 56.2 . . ? 
H35B C35 H35F 56.2 . . ? 
H35C C35 H35F 141.1 . . ? 
H35D C35 H35F 109.5 . . ? 
H35E C35 H35F 109.4 . . ? 
C34 C36 H36A 109.2 . . ? 
C34 C36 H36B 109.6 . . ? 
H36A C36 H36B 109.4 . . ? 
C34 C36 H36C 109.7 . . ? 
H36A C36 H36C 109.6 . . ? 
H36B C36 H36C 109.5 . . ? 
C34 C36 H36D 109.7 . . ? 
H36A C36 H36D 141.1 . . ? 
H36B C36 H36D 56.2 . . ? 
H36C C36 H36D 56.3 . . ? 
C34 C36 H36E 109.4 . . ? 
H36A C36 H36E 56.3 . . ? 
H36B C36 H36E 141.1 . . ? 
H36C C36 H36E 56.3 . . ? 
H36D C36 H36E 109.6 . . ? 
C34 C36 H36F 109.3 . . ? 
H36A C36 H36F 56.2 . . ? 
H36B C36 H36F 56.2 . . ? 
H36C C36 H36F 141.1 . . ? 
H36D C36 H36F 109.4 . . ? 
H36E C36 H36F 109.5 . . ? 
O2 C37 C38 107.0(3) . . ? 
O2 C37 Na1 42.80(14) . . ? 
C38 C37 Na1 148.2(3) . . ? 
O2 C37 H37A 110.3 . . ? 
C38 C37 H37A 110.3 . . ? 
Na1 C37 H37A 80.0 . . ? 
O2 C37 H37B 110.3 . . ? 
C38 C37 H37B 110.3 . . ? 
Na1 C37 H37B 93.4 . . ? 
H37A C37 H37B 108.6 . . ? 
C39 C38 C37 101.7(3) . . ? 
C39 C38 H38A 111.4 . . ? 
C37 C38 H38A 111.4 . . ? 
C39 C38 H38B 111.4 . . ? 
C37 C38 H38B 111.4 . . ? 
H38A C38 H38B 109.3 . . ? 
C38 C39 C40 102.7(3) . . ? 
C38 C39 H39A 111.2 . . ? 
C40 C39 H39A 111.2 . . ? 
C38 C39 H39B 111.2 . . ? 
C40 C39 H39B 111.2 . . ? 
H39A C39 H39B 109.1 . . ? 
O2 C40 C39 104.7(3) . . ? 
O2 C40 H40A 110.8 . . ? 
C39 C40 H40A 110.8 . . ? 
O2 C40 H40B 110.8 . . ? 
C39 C40 H40B 110.8 . . ? 
H40A C40 H40B 108.9 . . ? 
O4 C41 H41A 109.3 . . ? 
O4 C41 H41B 108.1 . . ? 
H41A C41 H41B 109.5 . . ? 
O4 C41 H41C 110.9 . . ? 
H41A C41 H41C 109.5 . . ? 
H41B C41 H41C 109.5 . . ? 
O4 C41 H41D 109.5 . . ? 
H41A C41 H41D 141.1 . . ? 
H41B C41 H41D 56.3 . . ? 
H41C C41 H41D 56.3 . . ? 
O4 C41 H41E 110.7 . . ? 
H41A C41 H41E 56.2 . . ? 
H41B C41 H41E 141.1 . . ? 
H41C C41 H41E 56.3 . . ? 
H41D C41 H41E 109.6 . . ? 
O4 C41 H41F 108.0 . . ? 
H41A C41 H41F 56.3 . . ? 
H41B C41 H41F 56.3 . . ? 
H41C C41 H41F 141.1 . . ? 
H41D C41 H41F 109.5 . . ? 
H41E C41 H41F 109.5 . . ? 
O4 C42 C43 114.0(4) . . ? 
O4 C42 H42A 108.8 . . ? 
C43 C42 H42A 108.8 . . ? 
O4 C42 H42B 108.8 . . ? 
C43 C42 H42B 108.8 . . ? 
H42A C42 H42B 107.7 . . ? 
O3 C43 C42 114.3(4) . . ? 
O3 C43 H43A 108.7 . . ? 
C42 C43 H43A 108.7 . . ? 
O3 C43 H43B 108.7 . . ? 
C42 C43 H43B 108.7 . . ? 
H43A C43 H43B 107.6 . . ? 
O3 C44 H44A 109.5 . . ? 
O3 C44 H44B 109.6 . . ? 
H44A C44 H44B 109.5 . . ? 
O3 C44 H44C 109.3 . . ? 
H44A C44 H44C 109.4 . . ? 
H44B C44 H44C 109.5 . . ? 
O3 C44 H44D 109.4 . . ? 
H44A C44 H44D 141.1 . . ? 
H44B C44 H44D 56.3 . . ? 
H44C C44 H44D 56.3 . . ? 
O3 C44 H44E 109.4 . . ? 
H44A C44 H44E 56.2 . . ? 
H44B C44 H44E 141.0 . . ? 
H44C C44 H44E 56.2 . . ? 
H44D C44 H44E 109.5 . . ? 
O3 C44 H44F 109.6 . . ? 
H44A C44 H44F 56.4 . . ? 
H44B C44 H44F 56.2 . . ? 
H44C C44 H44F 141.1 . . ? 
H44D C44 H44F 109.5 . . ? 
H44E C44 H44F 109.5 . . ? 
O5 C46 C45 129(2) . . ? 
C51 C49 C50 116(3) 3_565 . ? 
C49 C50 C51 135(2) . . ? 
C49 C51 C50 109(2) 3_565 . ? 
 
loop_ 
 _geom_torsion_atom_site_label_1 
 _geom_torsion_atom_site_label_2 
 _geom_torsion_atom_site_label_3 
 _geom_torsion_atom_site_label_4 
 _geom_torsion 
 _geom_torsion_site_symmetry_1 
 _geom_torsion_site_symmetry_2 
 _geom_torsion_site_symmetry_3 
 _geom_torsion_site_symmetry_4 
 _geom_torsion_publ_flag 
N3 Al1 Na1 O1 125.68(16) . . . . ? 
N1 Al1 Na1 O1 -87.08(16) . . . . ? 
N4 Al1 Na1 O1 -160.84(16) . . . . ? 
N2 Al1 Na1 O1 19.67(16) . . . . ? 
O1 Al1 Na1 O2 -143.54(16) . . . . ? 
N3 Al1 Na1 O2 -17.86(13) . . . . ? 
N1 Al1 Na1 O2 129.38(13) . . . . ? 
N4 Al1 Na1 O2 55.62(12) . . . . ? 
N2 Al1 Na1 O2 -123.86(12) . . . . ? 
O1 Al1 Na1 O3 73.22(16) . . . . ? 
N3 Al1 Na1 O3 -161.10(13) . . . . ? 
N1 Al1 Na1 O3 -13.86(16) . . . . ? 
N4 Al1 Na1 O3 -87.62(14) . . . . ? 
N2 Al1 Na1 O3 92.90(15) . . . . ? 
O1 Al1 Na1 O4 -20.32(16) . . . . ? 
N3 Al1 Na1 O4 105.36(14) . . . . ? 
N1 Al1 Na1 O4 -107.40(15) . . . . ? 
N4 Al1 Na1 O4 178.84(15) . . . . ? 
N2 Al1 Na1 O4 -0.64(16) . . . . ? 
O1 Al1 Na1 N4 160.84(16) . . . . ? 
N3 Al1 Na1 N4 -73.48(12) . . . . ? 
N1 Al1 Na1 N4 73.76(13) . . . . ? 
N2 Al1 Na1 N4 -179.49(13) . . . . ? 
O1 Al1 Na1 C24 136.91(15) . . . . ? 
N3 Al1 Na1 C24 -97.41(11) . . . . ? 
N1 Al1 Na1 C24 49.83(13) . . . . ? 
N4 Al1 Na1 C24 -23.93(11) . . . . ? 
N2 Al1 Na1 C24 156.58(12) . . . . ? 
O1 Al1 Na1 C37 -165.50(19) . . . . ? 
N3 Al1 Na1 C37 -39.83(16) . . . . ? 
N1 Al1 Na1 C37 107.41(16) . . . . ? 
N4 Al1 Na1 C37 33.66(15) . . . . ? 
N2 Al1 Na1 C37 -145.83(15) . . . . ? 
N3 Al1 O1 Na1 -69.02(15) . . . . ? 
N1 Al1 O1 Na1 115.11(13) . . . . ? 
N4 Al1 O1 Na1 16.07(13) . . . . ? 
N2 Al1 O1 Na1 -164.80(12) . . . . ? 
O2 Na1 O1 Al1 55.6(2) . . . . ? 
O3 Na1 O1 Al1 -124.57(13) . . . . ? 
O4 Na1 O1 Al1 163.76(13) . . . . ? 
N4 Na1 O1 Al1 -12.30(10) . . . . ? 
C24 Na1 O1 Al1 -35.87(12) . . . . ? 
C37 Na1 O1 Al1 43.2(6) . . . . ? 
O1 Na1 O2 C40 -18.9(4) . . . . ? 
O3 Na1 O2 C40 161.3(3) . . . . ? 
O4 Na1 O2 C40 -128.7(3) . . . . ? 
N4 Na1 O2 C40 38.6(3) . . . . ? 
C24 Na1 O2 C40 66.8(3) . . . . ? 
C37 Na1 O2 C40 154.1(5) . . . . ? 
Al1 Na1 O2 C40 9.5(3) . . . . ? 
O1 Na1 O2 C37 -173.0(2) . . . . ? 
O3 Na1 O2 C37 7.2(3) . . . . ? 
O4 Na1 O2 C37 77.2(3) . . . . ? 
N4 Na1 O2 C37 -115.5(2) . . . . ? 
C24 Na1 O2 C37 -87.4(2) . . . . ? 
Al1 Na1 O2 C37 -144.7(2) . . . . ? 
O1 Na1 O3 C43 -92.9(3) . . . . ? 
O2 Na1 O3 C43 86.9(3) . . . . ? 
O4 Na1 O3 C43 -2.8(3) . . . . ? 
N4 Na1 O3 C43 -167.3(3) . . . . ? 
C24 Na1 O3 C43 -174.4(3) . . . . ? 
C37 Na1 O3 C43 90.0(3) . . . . ? 
Al1 Na1 O3 C43 -124.9(3) . . . . ? 
O1 Na1 O3 C44 110.5(3) . . . . ? 
O2 Na1 O3 C44 -69.6(4) . . . . ? 
O4 Na1 O3 C44 -159.3(4) . . . . ? 
N4 Na1 O3 C44 36.1(4) . . . . ? 
C24 Na1 O3 C44 29.0(4) . . . . ? 
C37 Na1 O3 C44 -66.5(4) . . . . ? 
Al1 Na1 O3 C44 78.5(4) . . . . ? 
O1 Na1 O4 C41 -49.0(4) . . . . ? 
O2 Na1 O4 C41 94.7(4) . . . . ? 
O3 Na1 O4 C41 -163.8(4) . . . . ? 
N4 Na1 O4 C41 -36.7(6) . . . . ? 
C24 Na1 O4 C41 -137.9(4) . . . . ? 
C37 Na1 O4 C41 119.1(4) . . . . ? 
Al1 Na1 O4 C41 -39.0(5) . . . . ? 
O1 Na1 O4 C42 95.2(3) . . . . ? 
O2 Na1 O4 C42 -121.0(3) . . . . ? 
O3 Na1 O4 C42 -19.6(3) . . . . ? 
N4 Na1 O4 C42 107.6(4) . . . . ? 
C24 Na1 O4 C42 6.3(6) . . . . ? 
C37 Na1 O4 C42 -96.7(3) . . . . ? 
Al1 Na1 O4 C42 105.2(3) . . . . ? 
O1 Al1 N1 C1 90.4(2) . . . . ? 
N3 Al1 N1 C1 -85.5(3) . . . . ? 
N4 Al1 N1 C1 -172.4(2) . . . . ? 
N2 Al1 N1 C1 2.4(2) . . . . ? 
Na1 Al1 N1 C1 133.2(2) . . . . ? 
O1 Al1 N1 C7 -82.1(3) . . . . ? 
N3 Al1 N1 C7 102.0(3) . . . . ? 
N4 Al1 N1 C7 15.1(3) . . . . ? 
N2 Al1 N1 C7 -170.1(3) . . . . ? 
Na1 Al1 N1 C7 -39.3(3) . . . . ? 
O1 Al1 N2 C6 61.2(3) . . . . ? 
N3 Al1 N2 C6 -61.3(3) . . . . ? 
N1 Al1 N2 C6 176.2(3) . . . . ? 
N4 Al1 N2 C6 -126.8(10) . . . . ? 
Na1 Al1 N2 C6 49.3(3) . . . . ? 
O1 Al1 N2 C2 -117.6(2) . . . . ? 
N3 Al1 N2 C2 119.9(2) . . . . ? 
N1 Al1 N2 C2 -2.6(2) . . . . ? 
N4 Al1 N2 C2 54.4(11) . . . . ? 
Na1 Al1 N2 C2 -129.6(2) . . . . ? 
O1 Al1 N3 C19 92.2(2) . . . . ? 
N1 Al1 N3 C19 -92.2(2) . . . . ? 
N4 Al1 N3 C19 1.6(2) . . . . ? 
N2 Al1 N3 C19 -172.7(2) . . . . ? 
Na1 Al1 N3 C19 55.9(2) . . . . ? 
O1 Al1 N3 C25 -77.6(3) . . . . ? 
N1 Al1 N3 C25 97.9(3) . . . . ? 
N4 Al1 N3 C25 -168.2(3) . . . . ? 
N2 Al1 N3 C25 17.5(3) . . . . ? 
Na1 Al1 N3 C25 -114.0(3) . . . . ? 
O1 Al1 N4 C24 60.0(3) . . . . ? 
N3 Al1 N4 C24 -178.0(3) . . . . ? 
N1 Al1 N4 C24 -55.8(3) . . . . ? 
N2 Al1 N4 C24 -112.0(10) . . . . ? 
Na1 Al1 N4 C24 71.7(3) . . . . ? 
O1 Al1 N4 C20 -124.5(2) . . . . ? 
N3 Al1 N4 C20 -2.4(2) . . . . ? 
N1 Al1 N4 C20 119.8(2) . . . . ? 
N2 Al1 N4 C20 63.6(11) . . . . ? 
Na1 Al1 N4 C20 -112.8(2) . . . . ? 
O1 Al1 N4 Na1 -11.70(10) . . . . ? 
N3 Al1 N4 Na1 110.33(11) . . . . ? 
N1 Al1 N4 Na1 -127.44(10) . . . . ? 
N2 Al1 N4 Na1 176.3(10) . . . . ? 
O1 Na1 N4 C24 -122.29(18) . . . . ? 
O2 Na1 N4 C24 93.13(17) . . . . ? 
O3 Na1 N4 C24 -15.3(2) . . . . ? 
O4 Na1 N4 C24 -135.8(4) . . . . ? 
C37 Na1 N4 C24 69.60(18) . . . . ? 
Al1 Na1 N4 C24 -132.7(2) . . . . ? 
O1 Na1 N4 C20 122.46(19) . . . . ? 
O2 Na1 N4 C20 -22.11(19) . . . . ? 
O3 Na1 N4 C20 -130.54(18) . . . . ? 
O4 Na1 N4 C20 108.9(4) . . . . ? 
C24 Na1 N4 C20 -115.2(2) . . . . ? 
C37 Na1 N4 C20 -45.64(19) . . . . ? 
Al1 Na1 N4 C20 112.1(2) . . . . ? 
O1 Na1 N4 Al1 10.38(8) . . . . ? 
O2 Na1 N4 Al1 -134.20(9) . . . . ? 
O3 Na1 N4 Al1 117.37(11) . . . . ? 
O4 Na1 N4 Al1 -3.2(4) . . . . ? 
C24 Na1 N4 Al1 132.7(2) . . . . ? 
C37 Na1 N4 Al1 -157.73(10) . . . . ? 
C7 N1 C1 C2 171.4(3) . . . . ? 
Al1 N1 C1 C2 -1.8(4) . . . . ? 
C6 N2 C2 C1 -176.6(3) . . . . ? 
Al1 N2 C2 C1 2.4(3) . . . . ? 
C6 N2 C2 C3 1.5(4) . . . . ? 
Al1 N2 C2 C3 -179.5(3) . . . . ? 
N1 C1 C2 N2 -0.5(4) . . . . ? 
N1 C1 C2 C3 -178.5(3) . . . . ? 
N2 C2 C3 C4 -0.9(5) . . . . ? 
C1 C2 C3 C4 177.0(3) . . . . ? 
C2 C3 C4 C5 -0.7(6) . . . . ? 
C3 C4 C5 C6 1.6(6) . . . . ? 
C2 N2 C6 C5 -0.6(5) . . . . ? 
Al1 N2 C6 C5 -179.4(3) . . . . ? 
C4 C5 C6 N2 -1.0(5) . . . . ? 
C1 N1 C7 C8 109.1(4) . . . . ? 
Al1 N1 C7 C8 -78.5(4) . . . . ? 
C1 N1 C7 C12 -74.1(4) . . . . ? 
Al1 N1 C7 C12 98.3(3) . . . . ? 
C12 C7 C8 C9 0.6(5) . . . . ? 
N1 C7 C8 C9 177.3(3) . . . . ? 
C12 C7 C8 C13 177.9(3) . . . . ? 
N1 C7 C8 C13 -5.3(5) . . . . ? 
C7 C8 C9 C10 -0.3(5) . . . . ? 
C13 C8 C9 C10 -177.7(3) . . . . ? 
C8 C9 C10 C11 0.5(6) . . . . ? 
C9 C10 C11 C12 -1.0(6) . . . . ? 
C8 C7 C12 C11 -1.0(5) . . . . ? 
N1 C7 C12 C11 -177.7(3) . . . . ? 
C8 C7 C12 C16 178.1(3) . . . . ? 
N1 C7 C12 C16 1.3(5) . . . . ? 
C10 C11 C12 C7 1.2(6) . . . . ? 
C10 C11 C12 C16 -177.9(4) . . . . ? 
C9 C8 C13 C14 -31.7(5) . . . . ? 
C7 C8 C13 C14 151.0(3) . . . . ? 
C9 C8 C13 C15 92.0(4) . . . . ? 
C7 C8 C13 C15 -85.3(4) . . . . ? 
C7 C12 C16 C17 -117.8(5) . . . . ? 
C11 C12 C16 C17 61.2(6) . . . . ? 
C7 C12 C16 C18 114.7(5) . . . . ? 
C11 C12 C16 C18 -66.2(5) . . . . ? 
C25 N3 C19 C20 170.7(3) . . . . ? 
Al1 N3 C19 C20 -0.5(4) . . . . ? 
N3 C19 C20 N4 -1.6(4) . . . . ? 
N3 C19 C20 C21 177.1(3) . . . . ? 
C24 N4 C20 C19 179.0(3) . . . . ? 
Al1 N4 C20 C19 2.8(3) . . . . ? 
Na1 N4 C20 C19 -92.8(3) . . . . ? 
C24 N4 C20 C21 0.2(4) . . . . ? 
Al1 N4 C20 C21 -176.0(2) . . . . ? 
Na1 N4 C20 C21 88.3(3) . . . . ? 
C19 C20 C21 C22 -180.0(3) . . . . ? 
N4 C20 C21 C22 -1.3(5) . . . . ? 
C20 C21 C22 C23 0.9(5) . . . . ? 
C21 C22 C23 C24 0.5(5) . . . . ? 
C22 C23 C24 N4 -1.7(5) . . . . ? 
C22 C23 C24 Na1 -87.8(3) . . . . ? 
C20 N4 C24 C23 1.3(5) . . . . ? 
Al1 N4 C24 C23 176.7(3) . . . . ? 
Na1 N4 C24 C23 -107.9(3) . . . . ? 
C20 N4 C24 Na1 109.2(2) . . . . ? 
Al1 N4 C24 Na1 -75.4(2) . . . . ? 
O1 Na1 C24 C23 171.7(2) . . . . ? 
O2 Na1 C24 C23 30.4(2) . . . . ? 
O3 Na1 C24 C23 -72.2(2) . . . . ? 
O4 Na1 C24 C23 -96.4(4) . . . . ? 
N4 Na1 C24 C23 121.1(3) . . . . ? 
C37 Na1 C24 C23 5.3(2) . . . . ? 
Al1 Na1 C24 C23 151.6(2) . . . . ? 
O1 Na1 C24 N4 50.59(16) . . . . ? 
O2 Na1 C24 N4 -90.64(16) . . . . ? 
O3 Na1 C24 N4 166.75(17) . . . . ? 
O4 Na1 C24 N4 142.5(3) . . . . ? 
C37 Na1 C24 N4 -115.75(17) . . . . ? 
Al1 Na1 C24 N4 30.55(13) . . . . ? 
C19 N3 C25 C26 -76.0(4) . . . . ? 
Al1 N3 C25 C26 93.7(3) . . . . ? 
C19 N3 C25 C30 106.5(3) . . . . ? 
Al1 N3 C25 C30 -83.9(4) . . . . ? 
C30 C25 C26 C27 0.7(4) . . . . ? 
N3 C25 C26 C27 -176.8(3) . . . . ? 
C30 C25 C26 C31 179.2(3) . . . . ? 
N3 C25 C26 C31 1.6(4) . . . . ? 
C25 C26 C27 C28 0.5(5) . . . . ? 
C31 C26 C27 C28 -178.0(3) . . . . ? 
C26 C27 C28 C29 -1.0(5) . . . . ? 
C27 C28 C29 C30 0.5(5) . . . . ? 
C28 C29 C30 C25 0.7(5) . . . . ? 
C28 C29 C30 C34 -176.0(3) . . . . ? 
C26 C25 C30 C29 -1.3(4) . . . . ? 
N3 C25 C30 C29 176.3(3) . . . . ? 
C26 C25 C30 C34 175.5(3) . . . . ? 
N3 C25 C30 C34 -7.0(4) . . . . ? 
C25 C26 C31 C32 -124.3(4) . . . . ? 
C27 C26 C31 C32 54.2(4) . . . . ? 
C25 C26 C31 C33 112.0(4) . . . . ? 
C27 C26 C31 C33 -69.5(4) . . . . ? 
C29 C30 C34 C35 -36.2(4) . . . . ? 
C25 C30 C34 C35 147.2(3) . . . . ? 
C29 C30 C34 C36 88.6(3) . . . . ? 
C25 C30 C34 C36 -88.0(3) . . . . ? 
C40 O2 C37 C38 7.1(4) . . . . ? 
Na1 O2 C37 C38 167.8(3) . . . . ? 
C40 O2 C37 Na1 -160.6(3) . . . . ? 
O1 Na1 C37 O2 18.5(6) . . . . ? 
O3 Na1 C37 O2 -172.8(3) . . . . ? 
O4 Na1 C37 O2 -103.3(3) . . . . ? 
N4 Na1 C37 O2 69.6(2) . . . . ? 
C24 Na1 C37 O2 95.7(2) . . . . ? 
Al1 Na1 C37 O2 49.7(3) . . . . ? 
O1 Na1 C37 C38 -4.1(9) . . . . ? 
O2 Na1 C37 C38 -22.6(5) . . . . ? 
O3 Na1 C37 C38 164.6(6) . . . . ? 
O4 Na1 C37 C38 -125.9(6) . . . . ? 
N4 Na1 C37 C38 47.0(6) . . . . ? 
C24 Na1 C37 C38 73.1(6) . . . . ? 
Al1 Na1 C37 C38 27.1(6) . . . . ? 
O2 C37 C38 C39 -28.1(4) . . . . ? 
Na1 C37 C38 C39 -12.2(7) . . . . ? 
C37 C38 C39 C40 37.1(4) . . . . ? 
C37 O2 C40 C39 16.7(4) . . . . ? 
Na1 O2 C40 C39 -137.9(3) . . . . ? 
C38 C39 C40 O2 -33.9(4) . . . . ? 
C41 O4 C42 C43 -171.9(6) . . . . ? 
Na1 O4 C42 C43 40.2(6) . . . . ? 
C44 O3 C43 C42 -176.0(5) . . . . ? 
Na1 O3 C43 C42 24.4(6) . . . . ? 
O4 C42 C43 O3 -43.9(7) . . . . ? 
C47 O5 C46 C45 -175(3) . . . . ? 
C51 C49 C50 C51 4(6) 3_565 . . . ? 
C49 C50 C51 C49 -4(6) . . . 3_565 ? 
 
_diffrn_measured_fraction_theta_max    0.968 
_diffrn_reflns_theta_full              70.06 
_diffrn_measured_fraction_theta_full   0.968 
_refine_diff_density_max    1.043 
_refine_diff_density_min   -0.384 
_refine_diff_density_rms    0.082 


 
data_twm34 
 
_audit_creation_method            SHELXL-97 
_chemical_name_systematic 
; 
 ? 
; 
_chemical_name_common             ? 
_chemical_melting_point           ? 
_chemical_formula_moiety          ? 
_chemical_formula_sum 
 'C59 H88 Al N5' 
_chemical_formula_weight          894.32 
 
loop_ 
 _atom_type_symbol 
 _atom_type_description 
 _atom_type_scat_dispersion_real 
 _atom_type_scat_dispersion_imag 
 _atom_type_scat_source 
 'C'  'C'   0.0033   0.0016 
 'International Tables Vol C Tables 4.2.6.8 and 6.1.1.4' 
 'H'  'H'   0.0000   0.0000 
 'International Tables Vol C Tables 4.2.6.8 and 6.1.1.4' 
 'N'  'N'   0.0061   0.0033 
 'International Tables Vol C Tables 4.2.6.8 and 6.1.1.4' 
 'Al'  'Al'   0.0645   0.0514 
 'International Tables Vol C Tables 4.2.6.8 and 6.1.1.4' 
 
_symmetry_cell_setting            Monoclinic 
_symmetry_space_group_name_H-M    P2(1)/c 
 
loop_ 
 _symmetry_equiv_pos_as_xyz 
 'x, y, z' 
 '-x, y+1/2, -z+1/2' 
 '-x, -y, -z' 
 'x, -y-1/2, z-1/2' 
 
_cell_length_a                    13.4440(10) 
_cell_length_b                    12.1181(9) 
_cell_length_c                    33.736(3) 
_cell_angle_alpha                 90.00 
_cell_angle_beta                  94.184(2) 
_cell_angle_gamma                 90.00 
_cell_volume                      5481.4(7) 
_cell_formula_units_Z             4 
_cell_measurement_temperature     100(2) 
_cell_measurement_reflns_used     90 
_cell_measurement_theta_min       2.54 
_cell_measurement_theta_max       28.32 
 
_exptl_crystal_description        Block 
_exptl_crystal_colour             Purple 
_exptl_crystal_size_max           0.33 
_exptl_crystal_size_mid           0.15
_exptl_crystal_size_min           0.12
_exptl_crystal_density_meas       ? 
_exptl_crystal_density_diffrn     1.084 
_exptl_crystal_density_method     'not measured' 
_exptl_crystal_F_000              1960 
_exptl_absorpt_coefficient_mu     0.077 
_exptl_absorpt_correction_type    'Numerical Analytical' 
_exptl_absorpt_correction_T_min   0.978 
_exptl_absorpt_correction_T_max   0.992 
_exptl_absorpt_process_details    'SADABS' 
 
_exptl_special_details 
; 
 ? 
; 
 
_diffrn_ambient_temperature       100(2) 
_diffrn_radiation_wavelength      0.71073 
_diffrn_radiation_type            MoK\a 
_diffrn_radiation_source          'fine-focus sealed tube' 
_diffrn_radiation_monochromator   graphite 
_diffrn_measurement_device_type   'CCD area detector' 
_diffrn_measurement_method        'phi and omega scans' 
_diffrn_detector_area_resol_mean  ? 
_diffrn_reflns_number             58832 
_diffrn_reflns_av_R_equivalents   0.1483 
_diffrn_reflns_av_sigmaI/netI     0.1459 
_diffrn_reflns_limit_h_min        -17 
_diffrn_reflns_limit_h_max        17 
_diffrn_reflns_limit_k_min        -15 
_diffrn_reflns_limit_k_max        15 
_diffrn_reflns_limit_l_min        -43 
_diffrn_reflns_limit_l_max        43 
_diffrn_reflns_theta_min          1.21 
_diffrn_reflns_theta_max          27.61 
_reflns_number_total              12666 
_reflns_number_gt                 5468 
_reflns_threshold_expression      >2sigma(I) 
 
_computing_data_collection        'Bruker Duo' 
_computing_cell_refinement        'Bruker Duo' 
_computing_data_reduction         'Bruker Saint' 
_computing_structure_solution     'SHELXS-97 (Sheldrick, 2008)' 
_computing_structure_refinement   'SHELXL-97 (Sheldrick, 2008)' 
_computing_molecular_graphics     'Bruker Shelxtl' 
_computing_publication_material   'Bruker Shelxtl' 
 
_refine_special_details 
; 
 Refinement of F^2^ against ALL reflections.  The weighted R-factor wR and 
 goodness of fit S are based on F^2^, conventional R-factors R are based 
 on F, with F set to zero for negative F^2^. The threshold expression of 
 F^2^ > 2sigma(F^2^) is used only for calculating R-factors(gt) etc. and is 
 not relevant to the choice of reflections for refinement.  R-factors based 
 on F^2^ are statistically about twice as large as those based on F, and R- 
 factors based on ALL data will be even larger. 
; 
 
_refine_ls_structure_factor_coef  Fsqd  
_refine_ls_matrix_type            full 
_refine_ls_weighting_scheme       calc  
_refine_ls_weighting_details 
 'calc w=1/[\s^2^(Fo^2^)+(0.1000P)^2^+0.0000P] where P=(Fo^2^+2Fc^2^)/3' 
_atom_sites_solution_primary      direct 
_atom_sites_solution_secondary    difmap 
_atom_sites_solution_hydrogens    geom 
_refine_ls_hydrogen_treatment     constr 
_refine_ls_extinction_method      none 
_refine_ls_extinction_coef        ? 
_refine_ls_number_reflns          12666 
_refine_ls_number_parameters      586 
_refine_ls_number_restraints      0 
_refine_ls_R_factor_all           0.2024 
_refine_ls_R_factor_gt            0.0753 
_refine_ls_wR_factor_ref          0.2420 
_refine_ls_wR_factor_gt           0.1741 
_refine_ls_goodness_of_fit_ref    1.089 
_refine_ls_restrained_S_all       1.089 
_refine_ls_shift/su_max           0.000 
_refine_ls_shift/su_mean          0.000 
 
loop_ 
 _atom_site_label 
 _atom_site_type_symbol 
 _atom_site_fract_x 
 _atom_site_fract_y 
 _atom_site_fract_z 
 _atom_site_U_iso_or_equiv 
 _atom_site_adp_type 
 _atom_site_occupancy 
 _atom_site_symmetry_multiplicity 
 _atom_site_calc_flag 
 _atom_site_refinement_flags 
 _atom_site_disorder_assembly 
 _atom_site_disorder_group 
Al1 Al 0.24050(7) 0.37948(9) 0.13914(3) 0.0238(3) Uani 1 1 d . . . 
N1 N 0.20223(19) 0.5127(2) 0.11713(8) 0.0259(7) Uani 1 1 d . . . 
N2 N 0.1505(2) 0.3118(2) 0.10209(8) 0.0259(7) Uani 1 1 d . . . 
N3 N 0.37155(19) 0.3382(2) 0.14967(8) 0.0245(6) Uani 1 1 d . . . 
N4 N 0.21902(19) 0.3450(2) 0.19143(8) 0.0242(7) Uani 1 1 d . . . 
N5 N 0.8187(2) 0.1462(2) 0.14228(8) 0.0269(7) Uani 1 1 d . . . 
C1 C 0.1245(2) 0.4979(3) 0.08718(10) 0.0290(8) Uani 1 1 d . . . 
H1A H 0.0943 0.5575 0.0738 0.035 Uiso 1 1 calc R . . 
C2 C 0.0963(2) 0.3935(3) 0.07900(10) 0.0260(8) Uani 1 1 d . . . 
C3 C 0.0178(3) 0.3572(4) 0.05055(11) 0.0348(9) Uani 1 1 d . . . 
H3A H -0.0219 0.4095 0.0368 0.042 Uiso 1 1 calc R . . 
C4 C 0.0006(3) 0.2497(3) 0.04350(11) 0.0359(10) Uani 1 1 d . . . 
H4A H -0.0500 0.2278 0.0249 0.043 Uiso 1 1 calc R . . 
C5 C 0.0611(3) 0.1690(3) 0.06493(11) 0.0352(9) Uani 1 1 d . . . 
H5A H 0.0523 0.0941 0.0597 0.042 Uiso 1 1 calc R . . 
C6 C 0.1314(3) 0.2037(3) 0.09298(11) 0.0320(9) Uani 1 1 d . . . 
H6A H 0.1693 0.1503 0.1070 0.038 Uiso 1 1 calc R . . 
C7 C 0.2448(2) 0.6206(3) 0.11980(10) 0.0243(8) Uani 1 1 d . . . 
C8 C 0.2413(2) 0.6837(3) 0.15491(10) 0.0257(8) Uani 1 1 d . . . 
C9 C 0.2816(3) 0.7894(3) 0.15597(11) 0.0306(8) Uani 1 1 d . . . 
H9A H 0.2821 0.8302 0.1793 0.037 Uiso 1 1 calc R . . 
C10 C 0.3208(3) 0.8349(3) 0.12305(12) 0.0356(9) Uani 1 1 d . . . 
H10A H 0.3440 0.9073 0.1239 0.043 Uiso 1 1 calc R . . 
C11 C 0.3255(3) 0.7734(3) 0.08906(12) 0.0365(9) Uani 1 1 d . . . 
H11A H 0.3527 0.8045 0.0671 0.044 Uiso 1 1 calc R . . 
C12 C 0.2904(2) 0.6653(3) 0.08686(10) 0.0290(8) Uani 1 1 d . . . 
C13 C 0.1927(2) 0.6392(3) 0.19083(10) 0.0269(8) Uani 1 1 d . . . 
H13A H 0.1535 0.5741 0.1824 0.032 Uiso 1 1 calc R . . 
C14 C 0.1219(3) 0.7229(3) 0.20781(11) 0.0346(9) Uani 1 1 d . . . 
H14A H 0.0727 0.7453 0.1873 0.052 Uiso 1 1 calc R . . 
H14B H 0.1591 0.7862 0.2175 0.052 Uiso 1 1 calc R . . 
H14C H 0.0894 0.6896 0.2292 0.052 Uiso 1 1 calc R . . 
C15 C 0.2715(3) 0.6030(3) 0.22341(10) 0.0346(9) Uani 1 1 d . . . 
H15A H 0.3158 0.5506 0.2126 0.052 Uiso 1 1 calc R . . 
H15B H 0.2392 0.5697 0.2448 0.052 Uiso 1 1 calc R . . 
H15C H 0.3089 0.6662 0.2331 0.052 Uiso 1 1 calc R . . 
C16 C 0.3037(3) 0.5993(3) 0.04961(11) 0.0355(9) Uani 1 1 d . . . 
H16A H 0.2778 0.5250 0.0539 0.043 Uiso 1 1 calc R . . 
C17 C 0.2438(3) 0.6478(4) 0.01344(11) 0.0488(12) Uani 1 1 d . . . 
H17A H 0.1750 0.6541 0.0190 0.073 Uiso 1 1 calc R . . 
H17B H 0.2494 0.6003 -0.0091 0.073 Uiso 1 1 calc R . . 
H17C H 0.2695 0.7195 0.0077 0.073 Uiso 1 1 calc R . . 
C18 C 0.4143(3) 0.5878(4) 0.04204(12) 0.0444(11) Uani 1 1 d . . . 
H18A H 0.4500 0.5572 0.0652 0.067 Uiso 1 1 calc R . . 
H18B H 0.4411 0.6591 0.0365 0.067 Uiso 1 1 calc R . . 
H18C H 0.4210 0.5398 0.0197 0.067 Uiso 1 1 calc R . . 
C19 C 0.3882(3) 0.3027(3) 0.18979(10) 0.0274(8) Uani 1 1 d . . . 
H19A H 0.4505 0.2788 0.2002 0.033 Uiso 1 1 calc R . . 
C20 C 0.3084(2) 0.3056(3) 0.21207(10) 0.0251(8) Uani 1 1 d . . . 
C21 C 0.3050(3) 0.2728(3) 0.25271(10) 0.0305(8) Uani 1 1 d . . . 
H21A H 0.3624 0.2457 0.2664 0.037 Uiso 1 1 calc R . . 
C22 C 0.2204(3) 0.2805(3) 0.27151(11) 0.0349(9) Uani 1 1 d . . . 
H22A H 0.2194 0.2588 0.2979 0.042 Uiso 1 1 calc R . . 
C23 C 0.1311(3) 0.3227(3) 0.25038(11) 0.0329(9) Uani 1 1 d . . . 
H23A H 0.0723 0.3298 0.2631 0.040 Uiso 1 1 calc R . . 
C24 C 0.1346(3) 0.3515(3) 0.21210(11) 0.0283(8) Uani 1 1 d . . . 
H24A H 0.0764 0.3775 0.1987 0.034 Uiso 1 1 calc R . . 
C25 C 0.4588(2) 0.3555(3) 0.12869(10) 0.0262(8) Uani 1 1 d . . . 
C26 C 0.5323(2) 0.4317(3) 0.14270(10) 0.0264(8) Uani 1 1 d . . . 
C27 C 0.6152(2) 0.4486(3) 0.12123(11) 0.0310(9) Uani 1 1 d . . . 
H27A H 0.6644 0.4977 0.1308 0.037 Uiso 1 1 calc R . . 
C28 C 0.6259(3) 0.3940(3) 0.08592(11) 0.0339(9) Uani 1 1 d . . . 
H28A H 0.6812 0.4073 0.0716 0.041 Uiso 1 1 calc R . . 
C29 C 0.5540(3) 0.3193(3) 0.07194(11) 0.0322(9) Uani 1 1 d . . . 
H29A H 0.5612 0.2829 0.0481 0.039 Uiso 1 1 calc R . . 
C30 C 0.4712(2) 0.2978(3) 0.09297(10) 0.0276(8) Uani 1 1 d . . . 
C31 C 0.5205(3) 0.5039(3) 0.17912(10) 0.0298(8) Uani 1 1 d . . . 
H31A H 0.4576 0.4835 0.1901 0.036 Uiso 1 1 calc R . . 
C32 C 0.5140(3) 0.6258(3) 0.16784(12) 0.0383(10) Uani 1 1 d . . . 
H32A H 0.4610 0.6363 0.1475 0.058 Uiso 1 1 calc R . . 
H32B H 0.5760 0.6490 0.1581 0.058 Uiso 1 1 calc R . . 
H32C H 0.5008 0.6687 0.1908 0.058 Uiso 1 1 calc R . . 
C33 C 0.6044(3) 0.4840(4) 0.21151(11) 0.0390(10) Uani 1 1 d . . . 
H33A H 0.6071 0.4070 0.2181 0.059 Uiso 1 1 calc R . . 
H33B H 0.5917 0.5262 0.2347 0.059 Uiso 1 1 calc R . . 
H33C H 0.6668 0.5065 0.2020 0.059 Uiso 1 1 calc R . . 
C34 C 0.3941(3) 0.2148(3) 0.07623(11) 0.0323(9) Uani 1 1 d . . . 
H34A H 0.3467 0.2020 0.0965 0.039 Uiso 1 1 calc R . . 
C35 C 0.3359(3) 0.2611(4) 0.03934(12) 0.0428(10) Uani 1 1 d . . . 
H35A H 0.3071 0.3309 0.0457 0.064 Uiso 1 1 calc R . . 
H35B H 0.2838 0.2106 0.0307 0.064 Uiso 1 1 calc R . . 
H35C H 0.3801 0.2710 0.0185 0.064 Uiso 1 1 calc R . . 
C36 C 0.4404(3) 0.1030(3) 0.06635(12) 0.0435(10) Uani 1 1 d . . . 
H36A H 0.4769 0.0743 0.0896 0.065 Uiso 1 1 calc R . . 
H36B H 0.4848 0.1127 0.0456 0.065 Uiso 1 1 calc R . . 
H36C H 0.3885 0.0522 0.0577 0.065 Uiso 1 1 calc R . . 
C37 C 0.8880(3) 0.0984(3) 0.17543(10) 0.0309(9) Uani 1 1 d . . . 
H37A H 0.8783 0.1391 0.1996 0.037 Uiso 1 1 calc R . . 
H37B H 0.8681 0.0227 0.1798 0.037 Uiso 1 1 calc R . . 
C38 C 0.9982(3) 0.0994(3) 0.16875(11) 0.0318(9) Uani 1 1 d . . . 
H38A H 1.0201 0.1747 0.1652 0.038 Uiso 1 1 calc R . . 
H38B H 1.0095 0.0584 0.1448 0.038 Uiso 1 1 calc R . . 
C39 C 1.0582(3) 0.0481(3) 0.20393(12) 0.0370(9) Uani 1 1 d . . . 
H39A H 1.0478 0.0905 0.2277 0.044 Uiso 1 1 calc R . . 
H39B H 1.0343 -0.0263 0.2080 0.044 Uiso 1 1 calc R . . 
C40 C 1.1688(3) 0.0441(3) 0.19801(13) 0.0414(10) Uani 1 1 d . . . 
H40A H 1.2036 0.0112 0.2209 0.062 Uiso 1 1 calc R . . 
H40B H 1.1931 0.1177 0.1945 0.062 Uiso 1 1 calc R . . 
H40C H 1.1797 0.0009 0.1749 0.062 Uiso 1 1 calc R . . 
C41 C 0.8204(3) 0.0715(3) 0.10624(11) 0.0342(9) Uani 1 1 d . . . 
H41A H 0.8070 -0.0034 0.1145 0.041 Uiso 1 1 calc R . . 
H41B H 0.8872 0.0726 0.0971 0.041 Uiso 1 1 calc R . . 
C42 C 0.7468(3) 0.1010(4) 0.07131(11) 0.0429(10) Uani 1 1 d . . . 
H42A H 0.6811 0.1114 0.0808 0.052 Uiso 1 1 calc R . . 
H42B H 0.7668 0.1700 0.0597 0.052 Uiso 1 1 calc R . . 
C43 C 0.7415(4) 0.0114(4) 0.03958(13) 0.0563(13) Uani 1 1 d . . . 
H43A H 0.7296 -0.0589 0.0522 0.068 Uiso 1 1 calc R . . 
H43B H 0.6849 0.0263 0.0209 0.068 Uiso 1 1 calc R . . 
C44 C 0.8308(3) 0.0016(4) 0.01756(14) 0.0576(13) Uani 1 1 d . . . 
H44A H 0.8215 -0.0564 -0.0017 0.086 Uiso 1 1 calc R . . 
H44B H 0.8872 -0.0154 0.0357 0.086 Uiso 1 1 calc R . . 
H44C H 0.8424 0.0700 0.0043 0.086 Uiso 1 1 calc R . . 
C45 C 0.7147(3) 0.1535(3) 0.15696(11) 0.0315(9) Uani 1 1 d . . . 
H45A H 0.7188 0.1954 0.1815 0.038 Uiso 1 1 calc R . . 
H45B H 0.6729 0.1949 0.1376 0.038 Uiso 1 1 calc R . . 
C46 C 0.6637(3) 0.0450(3) 0.16433(12) 0.0350(9) Uani 1 1 d . . . 
H46A H 0.7049 0.0017 0.1833 0.042 Uiso 1 1 calc R . . 
H46B H 0.6551 0.0036 0.1397 0.042 Uiso 1 1 calc R . . 
C47 C 0.5626(3) 0.0654(3) 0.18034(11) 0.0349(9) Uani 1 1 d . . . 
H47A H 0.5715 0.1103 0.2041 0.042 Uiso 1 1 calc R . . 
H47B H 0.5211 0.1063 0.1608 0.042 Uiso 1 1 calc R . . 
C48 C 0.5100(3) -0.0409(4) 0.19012(13) 0.0479(11) Uani 1 1 d . . . 
H48A H 0.4467 -0.0239 0.2001 0.072 Uiso 1 1 calc R . . 
H48B H 0.5502 -0.0810 0.2099 0.072 Uiso 1 1 calc R . . 
H48C H 0.4997 -0.0850 0.1665 0.072 Uiso 1 1 calc R . . 
C49 C 0.8522(3) 0.2604(3) 0.13096(10) 0.0299(8) Uani 1 1 d . . . 
H49A H 0.9168 0.2540 0.1200 0.036 Uiso 1 1 calc R . . 
H49B H 0.8057 0.2883 0.1100 0.036 Uiso 1 1 calc R . . 
C50 C 0.8607(3) 0.3446(3) 0.16399(10) 0.0296(8) Uani 1 1 d . . . 
H50A H 0.9053 0.3173 0.1857 0.036 Uiso 1 1 calc R . . 
H50B H 0.7957 0.3566 0.1740 0.036 Uiso 1 1 calc R . . 
C51 C 0.9008(3) 0.4532(3) 0.14861(11) 0.0316(9) Uani 1 1 d . . . 
H51A H 0.9661 0.4407 0.1390 0.038 Uiso 1 1 calc R . . 
H51B H 0.8569 0.4789 0.1264 0.038 Uiso 1 1 calc R . . 
C52 C 0.9087(3) 0.5413(3) 0.18034(12) 0.0383(10) Uani 1 1 d . . . 
H52A H 0.9341 0.6080 0.1695 0.057 Uiso 1 1 calc R . . 
H52B H 0.9532 0.5168 0.2021 0.057 Uiso 1 1 calc R . . 
H52C H 0.8440 0.5550 0.1896 0.057 Uiso 1 1 calc R . . 
C53 C 1.0311(4) 0.8204(4) 0.09430(17) 0.0706(16) Uani 1 1 d . . . 
H53A H 1.0379 0.8577 0.1195 0.106 Uiso 1 1 calc R . . 
H53B H 1.0399 0.8723 0.0733 0.106 Uiso 1 1 calc R . . 
H53C H 1.0807 0.7635 0.0937 0.106 Uiso 1 1 calc R . . 
C54 C 0.9291(3) 0.7698(4) 0.08857(13) 0.0470(11) Uani 1 1 d . . . 
C55 C 0.9014(5) 0.7116(4) 0.05448(14) 0.0658(15) Uani 1 1 d . . . 
H55A H 0.9471 0.7017 0.0354 0.079 Uiso 1 1 calc R . . 
C56 C 0.8060(6) 0.6672(5) 0.04812(18) 0.086(2) Uani 1 1 d . . . 
H56A H 0.7883 0.6270 0.0252 0.104 Uiso 1 1 calc R . . 
C57 C 0.7371(5) 0.6840(5) 0.0766(2) 0.0818(19) Uani 1 1 d . . . 
H57A H 0.6721 0.6580 0.0725 0.098 Uiso 1 1 calc R . . 
C58 C 0.7668(4) 0.7392(5) 0.11051(17) 0.0672(15) Uani 1 1 d . . . 
H58A H 0.7221 0.7487 0.1300 0.081 Uiso 1 1 calc R . . 
C59 C 0.8605(4) 0.7807(4) 0.11650(13) 0.0508(12) Uani 1 1 d . . . 
H59A H 0.8786 0.8174 0.1401 0.061 Uiso 1 1 calc R . . 
 
loop_ 
 _atom_site_aniso_label 
 _atom_site_aniso_U_11 
 _atom_site_aniso_U_22 
 _atom_site_aniso_U_33 
 _atom_site_aniso_U_23 
 _atom_site_aniso_U_13 
 _atom_site_aniso_U_12 
Al1 0.0256(5) 0.0273(6) 0.0184(5) -0.0003(5) 0.0013(4) 0.0002(4) 
N1 0.0241(15) 0.0351(18) 0.0183(15) -0.0016(13) 0.0010(12) 0.0010(12) 
N2 0.0309(16) 0.0258(17) 0.0208(16) -0.0035(13) 0.0004(12) -0.0001(13) 
N3 0.0267(15) 0.0298(17) 0.0171(15) 0.0030(13) 0.0028(11) 0.0006(12) 
N4 0.0239(15) 0.0259(17) 0.0229(16) 0.0007(13) 0.0018(12) -0.0004(12) 
N5 0.0305(16) 0.0296(18) 0.0210(15) -0.0017(13) 0.0045(12) 0.0002(13) 
C1 0.0260(19) 0.035(2) 0.0250(19) 0.0015(17) -0.0020(15) 0.0019(16) 
C2 0.0278(18) 0.032(2) 0.0181(18) 0.0015(16) 0.0026(14) 0.0011(15) 
C3 0.032(2) 0.051(3) 0.0212(19) 0.0007(18) -0.0033(15) -0.0059(18) 
C4 0.034(2) 0.049(3) 0.023(2) -0.0057(19) -0.0022(16) -0.0124(19) 
C5 0.041(2) 0.038(2) 0.028(2) -0.0063(18) 0.0072(17) -0.0120(18) 
C6 0.032(2) 0.037(2) 0.028(2) -0.0033(17) 0.0057(16) -0.0018(17) 
C7 0.0243(18) 0.025(2) 0.0235(18) 0.0040(15) -0.0009(14) 0.0001(14) 
C8 0.0268(18) 0.028(2) 0.0224(18) 0.0045(16) 0.0006(14) 0.0025(15) 
C9 0.033(2) 0.029(2) 0.029(2) 0.0020(17) 0.0020(16) 0.0005(16) 
C10 0.045(2) 0.026(2) 0.036(2) 0.0074(18) 0.0061(18) -0.0054(17) 
C11 0.037(2) 0.040(2) 0.032(2) 0.0101(19) 0.0055(17) -0.0018(18) 
C12 0.0275(19) 0.036(2) 0.0233(19) 0.0058(17) 0.0034(15) 0.0027(16) 
C13 0.0309(19) 0.027(2) 0.0230(19) -0.0011(15) 0.0020(15) 0.0007(15) 
C14 0.039(2) 0.032(2) 0.034(2) -0.0014(18) 0.0072(17) 0.0019(17) 
C15 0.037(2) 0.043(3) 0.023(2) 0.0022(18) 0.0010(16) 0.0005(18) 
C16 0.039(2) 0.046(3) 0.0216(19) 0.0026(18) 0.0069(16) 0.0030(18) 
C17 0.053(3) 0.071(3) 0.022(2) 0.006(2) -0.0006(18) 0.010(2) 
C18 0.043(2) 0.052(3) 0.040(3) 0.003(2) 0.0125(19) 0.007(2) 
C19 0.0246(18) 0.033(2) 0.0244(19) 0.0035(16) -0.0020(14) 0.0043(15) 
C20 0.0271(19) 0.028(2) 0.0200(18) 0.0012(15) 0.0012(14) 0.0007(15) 
C21 0.035(2) 0.032(2) 0.0234(19) 0.0062(17) -0.0016(16) -0.0008(16) 
C22 0.048(2) 0.036(2) 0.022(2) 0.0034(17) 0.0077(17) -0.0022(18) 
C23 0.033(2) 0.032(2) 0.035(2) 0.0013(18) 0.0117(17) 0.0004(17) 
C24 0.0282(19) 0.028(2) 0.029(2) -0.0005(16) 0.0040(15) -0.0001(15) 
C25 0.0276(19) 0.030(2) 0.0215(18) 0.0019(16) 0.0010(14) 0.0064(15) 
C26 0.0249(18) 0.030(2) 0.0239(19) 0.0053(16) -0.0004(14) 0.0032(15) 
C27 0.0233(19) 0.038(2) 0.032(2) 0.0029(18) 0.0022(15) 0.0000(16) 
C28 0.027(2) 0.049(3) 0.027(2) 0.0050(18) 0.0093(15) 0.0054(18) 
C29 0.035(2) 0.041(2) 0.0213(19) 0.0007(17) 0.0046(16) 0.0046(17) 
C30 0.0261(19) 0.036(2) 0.0208(18) 0.0009(16) 0.0021(14) 0.0001(15) 
C31 0.0290(19) 0.036(2) 0.025(2) -0.0018(17) 0.0027(15) -0.0008(16) 
C32 0.038(2) 0.035(2) 0.042(2) -0.0072(19) 0.0033(18) -0.0006(18) 
C33 0.038(2) 0.051(3) 0.027(2) -0.0050(19) -0.0019(17) 0.0032(19) 
C34 0.034(2) 0.039(2) 0.024(2) -0.0044(17) 0.0013(15) -0.0008(17) 
C35 0.046(2) 0.048(3) 0.033(2) -0.002(2) -0.0051(18) 0.000(2) 
C36 0.049(3) 0.045(3) 0.037(2) -0.004(2) 0.0026(19) 0.001(2) 
C37 0.039(2) 0.031(2) 0.0227(19) 0.0041(16) 0.0023(16) 0.0015(16) 
C38 0.034(2) 0.031(2) 0.031(2) 0.0014(17) 0.0043(16) 0.0039(16) 
C39 0.040(2) 0.033(2) 0.038(2) 0.0069(19) 0.0016(17) 0.0022(18) 
C40 0.039(2) 0.033(2) 0.051(3) 0.001(2) -0.0030(19) 0.0003(18) 
C41 0.043(2) 0.034(2) 0.026(2) -0.0050(17) 0.0065(17) 0.0053(17) 
C42 0.059(3) 0.043(3) 0.026(2) -0.0059(19) -0.0015(19) 0.002(2) 
C43 0.078(3) 0.052(3) 0.039(3) -0.005(2) 0.006(2) -0.006(3) 
C44 0.062(3) 0.053(3) 0.059(3) -0.014(3) 0.009(2) -0.007(2) 
C45 0.032(2) 0.037(2) 0.026(2) -0.0020(17) 0.0034(15) 0.0021(16) 
C46 0.036(2) 0.037(2) 0.032(2) -0.0034(18) 0.0013(16) -0.0027(17) 
C47 0.032(2) 0.044(3) 0.029(2) -0.0010(18) 0.0014(16) -0.0014(17) 
C48 0.042(2) 0.054(3) 0.047(3) 0.002(2) 0.005(2) -0.011(2) 
C49 0.031(2) 0.032(2) 0.026(2) 0.0024(17) 0.0012(15) 0.0015(16) 
C50 0.030(2) 0.033(2) 0.026(2) -0.0028(17) 0.0038(15) -0.0017(16) 
C51 0.030(2) 0.035(2) 0.030(2) 0.0004(17) -0.0007(16) -0.0024(16) 
C52 0.035(2) 0.035(2) 0.044(3) 0.000(2) 0.0011(18) -0.0007(17) 
C53 0.061(3) 0.069(4) 0.082(4) 0.017(3) 0.005(3) 0.021(3) 
C54 0.065(3) 0.041(3) 0.036(3) 0.008(2) 0.007(2) 0.016(2) 
C55 0.106(5) 0.056(3) 0.035(3) 0.001(2) 0.003(3) 0.028(3) 
C56 0.144(6) 0.053(4) 0.054(4) 0.000(3) -0.042(4) 0.009(4) 
C57 0.085(4) 0.061(4) 0.095(5) 0.034(4) -0.026(4) -0.020(3) 
C58 0.074(4) 0.066(4) 0.062(4) 0.028(3) 0.006(3) -0.006(3) 
C59 0.070(3) 0.047(3) 0.036(3) 0.008(2) 0.008(2) 0.008(2) 
 
_geom_special_details 
; 
 All esds (except the esd in the dihedral angle between two l.s. planes) 
 are estimated using the full covariance matrix.  The cell esds are taken 
 into account individually in the estimation of esds in distances, angles 
 and torsion angles; correlations between esds in cell parameters are only 
 used when they are defined by crystal symmetry.  An approximate (isotropic) 
 treatment of cell esds is used for estimating esds involving l.s. planes. 
; 
 
loop_ 
 _geom_bond_atom_site_label_1 
 _geom_bond_atom_site_label_2 
 _geom_bond_distance 
 _geom_bond_site_symmetry_2 
 _geom_bond_publ_flag 
Al1 N1 1.834(3) . ? 
Al1 N3 1.841(3) . ? 
Al1 N4 1.856(3) . ? 
Al1 N2 1.865(3) . ? 
N1 C1 1.411(4) . ? 
N1 C7 1.428(4) . ? 
N2 C6 1.366(5) . ? 
N2 C2 1.425(4) . ? 
N3 C19 1.422(4) . ? 
N3 C25 1.429(4) . ? 
N4 C24 1.377(4) . ? 
N4 C20 1.426(4) . ? 
N5 C49 1.513(4) . ? 
N5 C41 1.517(4) . ? 
N5 C37 1.517(4) . ? 
N5 C45 1.519(4) . ? 
C1 C2 1.344(5) . ? 
C1 H1A 0.9300 . ? 
C2 C3 1.443(5) . ? 
C3 C4 1.341(5) . ? 
C3 H3A 0.9300 . ? 
C4 C5 1.434(5) . ? 
C4 H4A 0.9300 . ? 
C5 C6 1.355(5) . ? 
C5 H5A 0.9300 . ? 
C6 H6A 0.9300 . ? 
C7 C8 1.413(5) . ? 
C7 C12 1.416(5) . ? 
C8 C9 1.390(5) . ? 
C8 C13 1.517(5) . ? 
C9 C10 1.379(5) . ? 
C9 H9A 0.9300 . ? 
C10 C11 1.373(5) . ? 
C10 H10A 0.9300 . ? 
C11 C12 1.392(5) . ? 
C11 H11A 0.9300 . ? 
C12 C16 1.511(5) . ? 
C13 C14 1.530(5) . ? 
C13 C15 1.534(5) . ? 
C13 H13A 0.9800 . ? 
C14 H14A 0.9600 . ? 
C14 H14B 0.9600 . ? 
C14 H14C 0.9600 . ? 
C15 H15A 0.9600 . ? 
C15 H15B 0.9600 . ? 
C15 H15C 0.9600 . ? 
C16 C17 1.530(5) . ? 
C16 C18 1.533(5) . ? 
C16 H16A 0.9800 . ? 
C17 H17A 0.9600 . ? 
C17 H17B 0.9600 . ? 
C17 H17C 0.9600 . ? 
C18 H18A 0.9600 . ? 
C18 H18B 0.9600 . ? 
C18 H18C 0.9600 . ? 
C19 C20 1.355(5) . ? 
C19 H19A 0.9300 . ? 
C20 C21 1.431(5) . ? 
C21 C22 1.346(5) . ? 
C21 H21A 0.9300 . ? 
C22 C23 1.444(5) . ? 
C22 H22A 0.9300 . ? 
C23 C24 1.342(5) . ? 
C23 H23A 0.9300 . ? 
C24 H24A 0.9300 . ? 
C25 C26 1.409(5) . ? 
C25 C30 1.414(5) . ? 
C26 C27 1.388(5) . ? 
C26 C31 1.526(5) . ? 
C27 C28 1.380(5) . ? 
C27 H27A 0.9300 . ? 
C28 C29 1.381(5) . ? 
C28 H28A 0.9300 . ? 
C29 C30 1.387(5) . ? 
C29 H29A 0.9300 . ? 
C30 C34 1.523(5) . ? 
C31 C32 1.527(5) . ? 
C31 C33 1.530(5) . ? 
C31 H31A 0.9800 . ? 
C32 H32A 0.9600 . ? 
C32 H32B 0.9600 . ? 
C32 H32C 0.9600 . ? 
C33 H33A 0.9600 . ? 
C33 H33B 0.9600 . ? 
C33 H33C 0.9600 . ? 
C34 C35 1.528(5) . ? 
C34 C36 1.538(5) . ? 
C34 H34A 0.9800 . ? 
C35 H35A 0.9600 . ? 
C35 H35B 0.9600 . ? 
C35 H35C 0.9600 . ? 
C36 H36A 0.9600 . ? 
C36 H36B 0.9600 . ? 
C36 H36C 0.9600 . ? 
C37 C38 1.515(5) . ? 
C37 H37A 0.9700 . ? 
C37 H37B 0.9700 . ? 
C38 C39 1.518(5) . ? 
C38 H38A 0.9700 . ? 
C38 H38B 0.9700 . ? 
C39 C40 1.515(5) . ? 
C39 H39A 0.9700 . ? 
C39 H39B 0.9700 . ? 
C40 H40A 0.9600 . ? 
C40 H40B 0.9600 . ? 
C40 H40C 0.9600 . ? 
C41 C42 1.525(5) . ? 
C41 H41A 0.9700 . ? 
C41 H41B 0.9700 . ? 
C42 C43 1.522(6) . ? 
C42 H42A 0.9700 . ? 
C42 H42B 0.9700 . ? 
C43 C44 1.462(6) . ? 
C43 H43A 0.9700 . ? 
C43 H43B 0.9700 . ? 
C44 H44A 0.9600 . ? 
C44 H44B 0.9600 . ? 
C44 H44C 0.9600 . ? 
C45 C46 1.512(5) . ? 
C45 H45A 0.9700 . ? 
C45 H45B 0.9700 . ? 
C46 C47 1.518(5) . ? 
C46 H46A 0.9700 . ? 
C46 H46B 0.9700 . ? 
C47 C48 1.518(5) . ? 
C47 H47A 0.9700 . ? 
C47 H47B 0.9700 . ? 
C48 H48A 0.9600 . ? 
C48 H48B 0.9600 . ? 
C48 H48C 0.9600 . ? 
C49 C50 1.508(5) . ? 
C49 H49A 0.9700 . ? 
C49 H49B 0.9700 . ? 
C50 C51 1.528(5) . ? 
C50 H50A 0.9700 . ? 
C50 H50B 0.9700 . ? 
C51 C52 1.509(5) . ? 
C51 H51A 0.9700 . ? 
C51 H51B 0.9700 . ? 
C52 H52A 0.9600 . ? 
C52 H52B 0.9600 . ? 
C52 H52C 0.9600 . ? 
C53 C54 1.501(7) . ? 
C53 H53A 0.9600 . ? 
C53 H53B 0.9600 . ? 
C53 H53C 0.9600 . ? 
C54 C59 1.372(6) . ? 
C54 C55 1.377(6) . ? 
C55 C56 1.393(8) . ? 
C55 H55A 0.9300 . ? 
C56 C57 1.398(9) . ? 
C56 H56A 0.9300 . ? 
C57 C58 1.359(8) . ? 
C57 H57A 0.9300 . ? 
C58 C59 1.357(7) . ? 
C58 H58A 0.9300 . ? 
C59 H59A 0.9300 . ? 
 
loop_ 
 _geom_angle_atom_site_label_1 
 _geom_angle_atom_site_label_2 
 _geom_angle_atom_site_label_3 
 _geom_angle 
 _geom_angle_site_symmetry_1 
 _geom_angle_site_symmetry_3 
 _geom_angle_publ_flag 
N1 Al1 N3 123.60(13) . . ? 
N1 Al1 N4 121.63(13) . . ? 
N3 Al1 N4 88.19(12) . . ? 
N1 Al1 N2 88.07(13) . . ? 
N3 Al1 N2 125.10(13) . . ? 
N4 Al1 N2 113.55(13) . . ? 
C1 N1 C7 115.7(3) . . ? 
C1 N1 Al1 110.5(2) . . ? 
C7 N1 Al1 133.0(2) . . ? 
C6 N2 C2 117.6(3) . . ? 
C6 N2 Al1 132.4(3) . . ? 
C2 N2 Al1 110.0(2) . . ? 
C19 N3 C25 116.0(3) . . ? 
C19 N3 Al1 110.4(2) . . ? 
C25 N3 Al1 132.3(2) . . ? 
C24 N4 C20 117.9(3) . . ? 
C24 N4 Al1 131.3(2) . . ? 
C20 N4 Al1 110.8(2) . . ? 
C49 N5 C41 108.7(3) . . ? 
C49 N5 C37 110.9(3) . . ? 
C41 N5 C37 108.5(3) . . ? 
C49 N5 C45 109.1(3) . . ? 
C41 N5 C45 111.4(3) . . ? 
C37 N5 C45 108.2(3) . . ? 
C2 C1 N1 116.7(3) . . ? 
C2 C1 H1A 121.7 . . ? 
N1 C1 H1A 121.7 . . ? 
C1 C2 N2 114.6(3) . . ? 
C1 C2 C3 127.2(3) . . ? 
N2 C2 C3 118.2(3) . . ? 
C4 C3 C2 121.5(4) . . ? 
C4 C3 H3A 119.3 . . ? 
C2 C3 H3A 119.3 . . ? 
C3 C4 C5 119.3(3) . . ? 
C3 C4 H4A 120.3 . . ? 
C5 C4 H4A 120.3 . . ? 
C6 C5 C4 118.8(4) . . ? 
C6 C5 H5A 120.6 . . ? 
C4 C5 H5A 120.6 . . ? 
C5 C6 N2 124.4(4) . . ? 
C5 C6 H6A 117.8 . . ? 
N2 C6 H6A 117.8 . . ? 
C8 C7 C12 119.6(3) . . ? 
C8 C7 N1 120.7(3) . . ? 
C12 C7 N1 119.7(3) . . ? 
C9 C8 C7 118.9(3) . . ? 
C9 C8 C13 119.7(3) . . ? 
C7 C8 C13 121.3(3) . . ? 
C10 C9 C8 121.3(4) . . ? 
C10 C9 H9A 119.4 . . ? 
C8 C9 H9A 119.4 . . ? 
C11 C10 C9 119.9(4) . . ? 
C11 C10 H10A 120.0 . . ? 
C9 C10 H10A 120.0 . . ? 
C10 C11 C12 121.3(4) . . ? 
C10 C11 H11A 119.4 . . ? 
C12 C11 H11A 119.4 . . ? 
C11 C12 C7 118.9(3) . . ? 
C11 C12 C16 118.8(3) . . ? 
C7 C12 C16 122.3(3) . . ? 
C8 C13 C14 112.3(3) . . ? 
C8 C13 C15 111.0(3) . . ? 
C14 C13 C15 109.7(3) . . ? 
C8 C13 H13A 107.9 . . ? 
C14 C13 H13A 107.9 . . ? 
C15 C13 H13A 107.9 . . ? 
C13 C14 H14A 109.5 . . ? 
C13 C14 H14B 109.5 . . ? 
H14A C14 H14B 109.5 . . ? 
C13 C14 H14C 109.5 . . ? 
H14A C14 H14C 109.5 . . ? 
H14B C14 H14C 109.5 . . ? 
C13 C15 H15A 109.5 . . ? 
C13 C15 H15B 109.5 . . ? 
H15A C15 H15B 109.5 . . ? 
C13 C15 H15C 109.5 . . ? 
H15A C15 H15C 109.5 . . ? 
H15B C15 H15C 109.5 . . ? 
C12 C16 C17 111.9(3) . . ? 
C12 C16 C18 111.2(3) . . ? 
C17 C16 C18 111.2(3) . . ? 
C12 C16 H16A 107.4 . . ? 
C17 C16 H16A 107.4 . . ? 
C18 C16 H16A 107.4 . . ? 
C16 C17 H17A 109.5 . . ? 
C16 C17 H17B 109.5 . . ? 
H17A C17 H17B 109.5 . . ? 
C16 C17 H17C 109.5 . . ? 
H17A C17 H17C 109.5 . . ? 
H17B C17 H17C 109.5 . . ? 
C16 C18 H18A 109.5 . . ? 
C16 C18 H18B 109.5 . . ? 
H18A C18 H18B 109.5 . . ? 
C16 C18 H18C 109.5 . . ? 
H18A C18 H18C 109.5 . . ? 
H18B C18 H18C 109.5 . . ? 
C20 C19 N3 116.3(3) . . ? 
C20 C19 H19A 121.8 . . ? 
N3 C19 H19A 121.8 . . ? 
C19 C20 N4 114.3(3) . . ? 
C19 C20 C21 127.3(3) . . ? 
N4 C20 C21 118.4(3) . . ? 
C22 C21 C20 121.3(3) . . ? 
C22 C21 H21A 119.3 . . ? 
C20 C21 H21A 119.3 . . ? 
C21 C22 C23 119.5(3) . . ? 
C21 C22 H22A 120.2 . . ? 
C23 C22 H22A 120.2 . . ? 
C24 C23 C22 118.7(3) . . ? 
C24 C23 H23A 120.6 . . ? 
C22 C23 H23A 120.6 . . ? 
C23 C24 N4 124.1(3) . . ? 
C23 C24 H24A 117.9 . . ? 
N4 C24 H24A 117.9 . . ? 
C26 C25 C30 119.1(3) . . ? 
C26 C25 N3 120.7(3) . . ? 
C30 C25 N3 120.1(3) . . ? 
C27 C26 C25 119.5(3) . . ? 
C27 C26 C31 118.0(3) . . ? 
C25 C26 C31 122.3(3) . . ? 
C28 C27 C26 121.2(3) . . ? 
C28 C27 H27A 119.4 . . ? 
C26 C27 H27A 119.4 . . ? 
C27 C28 C29 119.6(3) . . ? 
C27 C28 H28A 120.2 . . ? 
C29 C28 H28A 120.2 . . ? 
C28 C29 C30 121.1(3) . . ? 
C28 C29 H29A 119.5 . . ? 
C30 C29 H29A 119.5 . . ? 
C29 C30 C25 119.5(3) . . ? 
C29 C30 C34 119.0(3) . . ? 
C25 C30 C34 121.5(3) . . ? 
C26 C31 C32 111.2(3) . . ? 
C26 C31 C33 111.8(3) . . ? 
C32 C31 C33 110.9(3) . . ? 
C26 C31 H31A 107.6 . . ? 
C32 C31 H31A 107.6 . . ? 
C33 C31 H31A 107.6 . . ? 
C31 C32 H32A 109.5 . . ? 
C31 C32 H32B 109.5 . . ? 
H32A C32 H32B 109.5 . . ? 
C31 C32 H32C 109.5 . . ? 
H32A C32 H32C 109.5 . . ? 
H32B C32 H32C 109.5 . . ? 
C31 C33 H33A 109.5 . . ? 
C31 C33 H33B 109.5 . . ? 
H33A C33 H33B 109.5 . . ? 
C31 C33 H33C 109.5 . . ? 
H33A C33 H33C 109.5 . . ? 
H33B C33 H33C 109.5 . . ? 
C30 C34 C35 110.8(3) . . ? 
C30 C34 C36 112.7(3) . . ? 
C35 C34 C36 109.8(3) . . ? 
C30 C34 H34A 107.8 . . ? 
C35 C34 H34A 107.8 . . ? 
C36 C34 H34A 107.8 . . ? 
C34 C35 H35A 109.5 . . ? 
C34 C35 H35B 109.5 . . ? 
H35A C35 H35B 109.5 . . ? 
C34 C35 H35C 109.5 . . ? 
H35A C35 H35C 109.5 . . ? 
H35B C35 H35C 109.5 . . ? 
C34 C36 H36A 109.5 . . ? 
C34 C36 H36B 109.5 . . ? 
H36A C36 H36B 109.5 . . ? 
C34 C36 H36C 109.5 . . ? 
H36A C36 H36C 109.5 . . ? 
H36B C36 H36C 109.5 . . ? 
C38 C37 N5 116.2(3) . . ? 
C38 C37 H37A 108.2 . . ? 
N5 C37 H37A 108.2 . . ? 
C38 C37 H37B 108.2 . . ? 
N5 C37 H37B 108.2 . . ? 
H37A C37 H37B 107.4 . . ? 
C37 C38 C39 110.5(3) . . ? 
C37 C38 H38A 109.5 . . ? 
C39 C38 H38A 109.5 . . ? 
C37 C38 H38B 109.5 . . ? 
C39 C38 H38B 109.5 . . ? 
H38A C38 H38B 108.1 . . ? 
C40 C39 C38 112.4(3) . . ? 
C40 C39 H39A 109.1 . . ? 
C38 C39 H39A 109.1 . . ? 
C40 C39 H39B 109.1 . . ? 
C38 C39 H39B 109.1 . . ? 
H39A C39 H39B 107.9 . . ? 
C39 C40 H40A 109.5 . . ? 
C39 C40 H40B 109.5 . . ? 
H40A C40 H40B 109.5 . . ? 
C39 C40 H40C 109.5 . . ? 
H40A C40 H40C 109.5 . . ? 
H40B C40 H40C 109.5 . . ? 
N5 C41 C42 115.6(3) . . ? 
N5 C41 H41A 108.4 . . ? 
C42 C41 H41A 108.4 . . ? 
N5 C41 H41B 108.4 . . ? 
C42 C41 H41B 108.4 . . ? 
H41A C41 H41B 107.4 . . ? 
C43 C42 C41 111.8(4) . . ? 
C43 C42 H42A 109.3 . . ? 
C41 C42 H42A 109.3 . . ? 
C43 C42 H42B 109.3 . . ? 
C41 C42 H42B 109.3 . . ? 
H42A C42 H42B 107.9 . . ? 
C44 C43 C42 114.7(4) . . ? 
C44 C43 H43A 108.6 . . ? 
C42 C43 H43A 108.6 . . ? 
C44 C43 H43B 108.6 . . ? 
C42 C43 H43B 108.6 . . ? 
H43A C43 H43B 107.6 . . ? 
C43 C44 H44A 109.5 . . ? 
C43 C44 H44B 109.5 . . ? 
H44A C44 H44B 109.5 . . ? 
C43 C44 H44C 109.5 . . ? 
H44A C44 H44C 109.5 . . ? 
H44B C44 H44C 109.5 . . ? 
C46 C45 N5 116.3(3) . . ? 
C46 C45 H45A 108.2 . . ? 
N5 C45 H45A 108.2 . . ? 
C46 C45 H45B 108.2 . . ? 
N5 C45 H45B 108.2 . . ? 
H45A C45 H45B 107.4 . . ? 
C45 C46 C47 110.2(3) . . ? 
C45 C46 H46A 109.6 . . ? 
C47 C46 H46A 109.6 . . ? 
C45 C46 H46B 109.6 . . ? 
C47 C46 H46B 109.6 . . ? 
H46A C46 H46B 108.1 . . ? 
C48 C47 C46 112.5(3) . . ? 
C48 C47 H47A 109.1 . . ? 
C46 C47 H47A 109.1 . . ? 
C48 C47 H47B 109.1 . . ? 
C46 C47 H47B 109.1 . . ? 
H47A C47 H47B 107.8 . . ? 
C47 C48 H48A 109.5 . . ? 
C47 C48 H48B 109.5 . . ? 
H48A C48 H48B 109.5 . . ? 
C47 C48 H48C 109.5 . . ? 
H48A C48 H48C 109.5 . . ? 
H48B C48 H48C 109.5 . . ? 
C50 C49 N5 116.1(3) . . ? 
C50 C49 H49A 108.3 . . ? 
N5 C49 H49A 108.3 . . ? 
C50 C49 H49B 108.3 . . ? 
N5 C49 H49B 108.3 . . ? 
H49A C49 H49B 107.4 . . ? 
C49 C50 C51 110.0(3) . . ? 
C49 C50 H50A 109.7 . . ? 
C51 C50 H50A 109.7 . . ? 
C49 C50 H50B 109.7 . . ? 
C51 C50 H50B 109.7 . . ? 
H50A C50 H50B 108.2 . . ? 
C52 C51 C50 112.1(3) . . ? 
C52 C51 H51A 109.2 . . ? 
C50 C51 H51A 109.2 . . ? 
C52 C51 H51B 109.2 . . ? 
C50 C51 H51B 109.2 . . ? 
H51A C51 H51B 107.9 . . ? 
C51 C52 H52A 109.5 . . ? 
C51 C52 H52B 109.5 . . ? 
H52A C52 H52B 109.5 . . ? 
C51 C52 H52C 109.5 . . ? 
H52A C52 H52C 109.5 . . ? 
H52B C52 H52C 109.5 . . ? 
C54 C53 H53A 109.5 . . ? 
C54 C53 H53B 109.5 . . ? 
H53A C53 H53B 109.5 . . ? 
C54 C53 H53C 109.5 . . ? 
H53A C53 H53C 109.5 . . ? 
H53B C53 H53C 109.5 . . ? 
C59 C54 C55 117.9(5) . . ? 
C59 C54 C53 121.7(4) . . ? 
C55 C54 C53 120.4(5) . . ? 
C54 C55 C56 121.1(5) . . ? 
C54 C55 H55A 119.5 . . ? 
C56 C55 H55A 119.5 . . ? 
C55 C56 C57 119.1(5) . . ? 
C55 C56 H56A 120.4 . . ? 
C57 C56 H56A 120.4 . . ? 
C58 C57 C56 118.8(6) . . ? 
C58 C57 H57A 120.6 . . ? 
C56 C57 H57A 120.6 . . ? 
C59 C58 C57 121.3(6) . . ? 
C59 C58 H58A 119.3 . . ? 
C57 C58 H58A 119.3 . . ? 
C58 C59 C54 121.7(5) . . ? 
C58 C59 H59A 119.2 . . ? 
C54 C59 H59A 119.2 . . ? 
 
loop_ 
 _geom_torsion_atom_site_label_1 
 _geom_torsion_atom_site_label_2 
 _geom_torsion_atom_site_label_3 
 _geom_torsion_atom_site_label_4 
 _geom_torsion 
 _geom_torsion_site_symmetry_1 
 _geom_torsion_site_symmetry_2 
 _geom_torsion_site_symmetry_3 
 _geom_torsion_site_symmetry_4 
 _geom_torsion_publ_flag 
N3 Al1 N1 C1 135.7(2) . . . . ? 
N4 Al1 N1 C1 -112.9(2) . . . . ? 
N2 Al1 N1 C1 3.8(2) . . . . ? 
N3 Al1 N1 C7 -32.6(4) . . . . ? 
N4 Al1 N1 C7 78.8(3) . . . . ? 
N2 Al1 N1 C7 -164.6(3) . . . . ? 
N1 Al1 N2 C6 173.5(3) . . . . ? 
N3 Al1 N2 C6 42.7(4) . . . . ? 
N4 Al1 N2 C6 -62.6(3) . . . . ? 
N1 Al1 N2 C2 -3.9(2) . . . . ? 
N3 Al1 N2 C2 -134.7(2) . . . . ? 
N4 Al1 N2 C2 120.0(2) . . . . ? 
N1 Al1 N3 C19 127.8(2) . . . . ? 
N4 Al1 N3 C19 0.3(2) . . . . ? 
N2 Al1 N3 C19 -117.5(2) . . . . ? 
N1 Al1 N3 C25 -37.9(4) . . . . ? 
N4 Al1 N3 C25 -165.4(3) . . . . ? 
N2 Al1 N3 C25 76.8(4) . . . . ? 
N1 Al1 N4 C24 50.3(4) . . . . ? 
N3 Al1 N4 C24 179.4(3) . . . . ? 
N2 Al1 N4 C24 -52.7(3) . . . . ? 
N1 Al1 N4 C20 -129.5(2) . . . . ? 
N3 Al1 N4 C20 -0.4(2) . . . . ? 
N2 Al1 N4 C20 127.4(2) . . . . ? 
C7 N1 C1 C2 167.7(3) . . . . ? 
Al1 N1 C1 C2 -2.9(4) . . . . ? 
N1 C1 C2 N2 -0.3(4) . . . . ? 
N1 C1 C2 C3 178.4(3) . . . . ? 
C6 N2 C2 C1 -174.6(3) . . . . ? 
Al1 N2 C2 C1 3.3(4) . . . . ? 
C6 N2 C2 C3 6.5(4) . . . . ? 
Al1 N2 C2 C3 -175.6(2) . . . . ? 
C1 C2 C3 C4 176.1(4) . . . . ? 
N2 C2 C3 C4 -5.2(5) . . . . ? 
C2 C3 C4 C5 0.5(5) . . . . ? 
C3 C4 C5 C6 2.7(5) . . . . ? 
C4 C5 C6 N2 -1.2(5) . . . . ? 
C2 N2 C6 C5 -3.5(5) . . . . ? 
Al1 N2 C6 C5 179.2(3) . . . . ? 
C1 N1 C7 C8 119.4(3) . . . . ? 
Al1 N1 C7 C8 -72.8(4) . . . . ? 
C1 N1 C7 C12 -60.3(4) . . . . ? 
Al1 N1 C7 C12 107.5(3) . . . . ? 
C12 C7 C8 C9 1.2(5) . . . . ? 
N1 C7 C8 C9 -178.5(3) . . . . ? 
C12 C7 C8 C13 179.7(3) . . . . ? 
N1 C7 C8 C13 0.0(5) . . . . ? 
C7 C8 C9 C10 2.7(5) . . . . ? 
C13 C8 C9 C10 -175.9(3) . . . . ? 
C8 C9 C10 C11 -3.6(6) . . . . ? 
C9 C10 C11 C12 0.6(6) . . . . ? 
C10 C11 C12 C7 3.1(5) . . . . ? 
C10 C11 C12 C16 -176.1(3) . . . . ? 
C8 C7 C12 C11 -4.0(5) . . . . ? 
N1 C7 C12 C11 175.7(3) . . . . ? 
C8 C7 C12 C16 175.2(3) . . . . ? 
N1 C7 C12 C16 -5.1(5) . . . . ? 
C9 C8 C13 C14 46.1(4) . . . . ? 
C7 C8 C13 C14 -132.5(3) . . . . ? 
C9 C8 C13 C15 -77.2(4) . . . . ? 
C7 C8 C13 C15 104.3(4) . . . . ? 
C11 C12 C16 C17 -65.1(4) . . . . ? 
C7 C12 C16 C17 115.8(4) . . . . ? 
C11 C12 C16 C18 60.0(4) . . . . ? 
C7 C12 C16 C18 -119.2(4) . . . . ? 
C25 N3 C19 C20 168.2(3) . . . . ? 
Al1 N3 C19 C20 -0.1(4) . . . . ? 
N3 C19 C20 N4 -0.3(5) . . . . ? 
N3 C19 C20 C21 178.9(3) . . . . ? 
C24 N4 C20 C19 -179.4(3) . . . . ? 
Al1 N4 C20 C19 0.5(4) . . . . ? 
C24 N4 C20 C21 1.4(5) . . . . ? 
Al1 N4 C20 C21 -178.7(3) . . . . ? 
C19 C20 C21 C22 179.7(4) . . . . ? 
N4 C20 C21 C22 -1.2(5) . . . . ? 
C20 C21 C22 C23 0.0(6) . . . . ? 
C21 C22 C23 C24 1.1(6) . . . . ? 
C22 C23 C24 N4 -1.0(6) . . . . ? 
C20 N4 C24 C23 -0.3(5) . . . . ? 
Al1 N4 C24 C23 179.8(3) . . . . ? 
C19 N3 C25 C26 -58.6(4) . . . . ? 
Al1 N3 C25 C26 106.5(4) . . . . ? 
C19 N3 C25 C30 122.8(4) . . . . ? 
Al1 N3 C25 C30 -72.1(4) . . . . ? 
C30 C25 C26 C27 0.1(5) . . . . ? 
N3 C25 C26 C27 -178.6(3) . . . . ? 
C30 C25 C26 C31 175.0(3) . . . . ? 
N3 C25 C26 C31 -3.6(5) . . . . ? 
C25 C26 C27 C28 1.4(5) . . . . ? 
C31 C26 C27 C28 -173.7(3) . . . . ? 
C26 C27 C28 C29 -1.3(6) . . . . ? 
C27 C28 C29 C30 -0.4(6) . . . . ? 
C28 C29 C30 C25 1.9(5) . . . . ? 
C28 C29 C30 C34 179.9(3) . . . . ? 
C26 C25 C30 C29 -1.7(5) . . . . ? 
N3 C25 C30 C29 177.0(3) . . . . ? 
C26 C25 C30 C34 -179.7(3) . . . . ? 
N3 C25 C30 C34 -1.0(5) . . . . ? 
C27 C26 C31 C32 60.2(4) . . . . ? 
C25 C26 C31 C32 -114.8(4) . . . . ? 
C27 C26 C31 C33 -64.3(4) . . . . ? 
C25 C26 C31 C33 120.7(4) . . . . ? 
C29 C30 C34 C35 -70.4(4) . . . . ? 
C25 C30 C34 C35 107.6(4) . . . . ? 
C29 C30 C34 C36 53.1(5) . . . . ? 
C25 C30 C34 C36 -128.9(4) . . . . ? 
C49 N5 C37 C38 -52.1(4) . . . . ? 
C41 N5 C37 C38 67.3(4) . . . . ? 
C45 N5 C37 C38 -171.7(3) . . . . ? 
N5 C37 C38 C39 -179.4(3) . . . . ? 
C37 C38 C39 C40 178.3(3) . . . . ? 
C49 N5 C41 C42 -65.2(4) . . . . ? 
C37 N5 C41 C42 174.1(3) . . . . ? 
C45 N5 C41 C42 55.1(4) . . . . ? 
N5 C41 C42 C43 -170.4(3) . . . . ? 
C41 C42 C43 C44 -69.7(5) . . . . ? 
C49 N5 C45 C46 172.0(3) . . . . ? 
C41 N5 C45 C46 52.0(4) . . . . ? 
C37 N5 C45 C46 -67.2(4) . . . . ? 
N5 C45 C46 C47 177.8(3) . . . . ? 
C45 C46 C47 C48 -177.3(3) . . . . ? 
C41 N5 C49 C50 -176.6(3) . . . . ? 
C37 N5 C49 C50 -57.3(4) . . . . ? 
C45 N5 C49 C50 61.7(4) . . . . ? 
N5 C49 C50 C51 176.8(3) . . . . ? 
C49 C50 C51 C52 178.8(3) . . . . ? 
C59 C54 C55 C56 1.5(7) . . . . ? 
C53 C54 C55 C56 -177.9(5) . . . . ? 
C54 C55 C56 C57 1.1(8) . . . . ? 
C55 C56 C57 C58 -2.8(8) . . . . ? 
C56 C57 C58 C59 2.0(8) . . . . ? 
C57 C58 C59 C54 0.6(8) . . . . ? 
C55 C54 C59 C58 -2.4(7) . . . . ? 
C53 C54 C59 C58 177.0(4) . . . . ? 
 
_diffrn_measured_fraction_theta_max    0.995 
_diffrn_reflns_theta_full              27.61 
_diffrn_measured_fraction_theta_full   0.995 
_refine_diff_density_max    0.659 
_refine_diff_density_min   -0.574 
_refine_diff_density_rms    0.077 

 
data_twm36 
 
_audit_creation_method            SHELXL-97 
_chemical_name_systematic 
; 
 ? 
; 
_chemical_name_common             ? 
_chemical_melting_point           ? 
_chemical_formula_moiety          ? 
_chemical_formula_sum 
 'C72 H92 Al2 N8 O2' 
_chemical_formula_weight          1155.50 
 
loop_ 
 _atom_type_symbol 
 _atom_type_description 
 _atom_type_scat_dispersion_real 
 _atom_type_scat_dispersion_imag 
 _atom_type_scat_source 
 'C'  'C'   0.0033   0.0016 
 'International Tables Vol C Tables 4.2.6.8 and 6.1.1.4' 
 'H'  'H'   0.0000   0.0000 
 'International Tables Vol C Tables 4.2.6.8 and 6.1.1.4' 
 'N'  'N'   0.0061   0.0033 
 'International Tables Vol C Tables 4.2.6.8 and 6.1.1.4' 
 'O'  'O'   0.0106   0.0060 
 'International Tables Vol C Tables 4.2.6.8 and 6.1.1.4' 
 'Al'  'Al'   0.0645   0.0514 
 'International Tables Vol C Tables 4.2.6.8 and 6.1.1.4' 
 
_symmetry_cell_setting            Monoclinic 
_symmetry_space_group_name_H-M    C2/c
 
loop_ 
 _symmetry_equiv_pos_as_xyz 
 'x, y, z' 
 '-x, y, -z+1/2' 
 'x+1/2, y+1/2, z' 
 '-x+1/2, y+1/2, -z+1/2' 
 '-x, -y, -z' 
 'x, -y, z-1/2' 
 '-x+1/2, -y+1/2, -z' 
 'x+1/2, -y+1/2, z-1/2' 
 
_cell_length_a                    21.4551(9) 
_cell_length_b                    9.6906(4) 
_cell_length_c                    16.8461(7) 
_cell_angle_alpha                 90.00 
_cell_angle_beta                  113.1830(10) 
_cell_angle_gamma                 90.00 
_cell_volume                      3219.7(2) 
_cell_formula_units_Z             2 
_cell_measurement_temperature     100(2) 
_cell_measurement_reflns_used     90 
_cell_measurement_theta_min       2.54
_cell_measurement_theta_max       28.32
 
_exptl_crystal_description        Block 
_exptl_crystal_colour             Green 
_exptl_crystal_size_max           0.33 
_exptl_crystal_size_mid           0.11 
_exptl_crystal_size_min           0.08 
_exptl_crystal_density_meas       ? 
_exptl_crystal_density_diffrn     1.192 
_exptl_crystal_density_method     'not measured' 
_exptl_crystal_F_000              1244 
_exptl_absorpt_coefficient_mu     0.097 
_exptl_absorpt_correction_type    'Numerical Analytical' 
_exptl_absorpt_correction_T_min   0.9686 
_exptl_absorpt_correction_T_max   0.9922 
_exptl_absorpt_process_details    'SADABS' 
 
_exptl_special_details 
; 
 No hydrogen bonding expected in this complex 
; 
 
_diffrn_ambient_temperature       100(2) 
_diffrn_radiation_wavelength      0.71073 
_diffrn_radiation_type            MoK\a 
_diffrn_radiation_source          'fine-focus sealed tube' 
_diffrn_radiation_monochromator   graphite 
_diffrn_measurement_device_type   'CCD area detector' 
_diffrn_measurement_method        'phi and omega scans' 
_diffrn_detector_area_resol_mean  ? 
_diffrn_reflns_number             23313 
_diffrn_reflns_av_R_equivalents   0.1202 
_diffrn_reflns_av_sigmaI/netI     0.1035 
_diffrn_reflns_limit_h_min        -31 
_diffrn_reflns_limit_h_max        31 
_diffrn_reflns_limit_k_min        -14 
_diffrn_reflns_limit_k_max        14 
_diffrn_reflns_limit_l_min        -24 
_diffrn_reflns_limit_l_max        24 
_diffrn_reflns_theta_min          2.34 
_diffrn_reflns_theta_max          31.56 
_reflns_number_total              5384 
_reflns_number_gt                 3263 
_reflns_threshold_expression      >2sigma(I) 
 
_computing_data_collection        'Bruker Apex' 
_computing_cell_refinement        'Bruker Apex'
_computing_data_reduction         'Bruker saint'
_computing_structure_solution     'SHELXS-97 (Sheldrick, 2008)' 
_computing_structure_refinement   'SHELXL-97 (Sheldrick, 2008)' 
_computing_molecular_graphics     'Bruker Shelxtl'
_computing_publication_material   'Bruker Shelxtl'
 
_refine_special_details 
; 
 Refinement of F^2^ against ALL reflections.  The weighted R-factor wR and 
 goodness of fit S are based on F^2^, conventional R-factors R are based 
 on F, with F set to zero for negative F^2^. The threshold expression of 
 F^2^ > 2sigma(F^2^) is used only for calculating R-factors(gt) etc. and is 
 not relevant to the choice of reflections for refinement.  R-factors based 
 on F^2^ are statistically about twice as large as those based on F, and R- 
 factors based on ALL data will be even larger. 
; 
 
_refine_ls_structure_factor_coef  Fsqd  
_refine_ls_matrix_type            full 
_refine_ls_weighting_scheme       calc  
_refine_ls_weighting_details 
 'calc w=1/[\s^2^(Fo^2^)+(0.0833P)^2^+0.0000P] where P=(Fo^2^+2Fc^2^)/3' 
_atom_sites_solution_primary      direct 
_atom_sites_solution_secondary    difmap 
_atom_sites_solution_hydrogens    geom 
_refine_ls_hydrogen_treatment     constr 
_refine_ls_extinction_method      none 
_refine_ls_extinction_coef        ? 
_refine_ls_number_reflns          5384 
_refine_ls_number_parameters      191 
_refine_ls_number_restraints      0 
_refine_ls_R_factor_all           0.0926 
_refine_ls_R_factor_gt            0.0549 
_refine_ls_wR_factor_ref          0.1662 
_refine_ls_wR_factor_gt           0.1534 
_refine_ls_goodness_of_fit_ref    0.955 
_refine_ls_restrained_S_all       0.955 
_refine_ls_shift/su_max           0.000 
_refine_ls_shift/su_mean          0.000 
 
loop_ 
 _atom_site_label 
 _atom_site_type_symbol 
 _atom_site_fract_x 
 _atom_site_fract_y 
 _atom_site_fract_z 
 _atom_site_U_iso_or_equiv 
 _atom_site_adp_type 
 _atom_site_occupancy 
 _atom_site_symmetry_multiplicity 
 _atom_site_calc_flag 
 _atom_site_refinement_flags 
 _atom_site_disorder_assembly 
 _atom_site_disorder_group 
Al1 Al 0.0000 0.09564(7) 0.2500 0.01483(17) Uani 1 2 d S . . 
O1 O 0.0000 -0.08415(17) 0.2500 0.0254(4) Uani 1 2 d S . . 
H1 H -0.0126 -0.1124 0.2871 0.038 Uiso 0.50 1 calc PR . . 
N1 N 0.07723(6) 0.19220(13) 0.33269(8) 0.0155(3) Uani 1 1 d . . . 
N2 N 0.03300(7) 0.11536(14) 0.15307(8) 0.0173(3) Uani 1 1 d . . . 
C1 C 0.07199(8) 0.22284(17) 0.40847(10) 0.0194(3) Uani 1 1 d . . . 
H1A H 0.1062 0.2701 0.4521 0.023 Uiso 1 1 calc R . . 
C2 C -0.01326(8) 0.18064(17) 0.08160(10) 0.0200(3) Uani 1 1 d . . . 
C3 C -0.00009(10) 0.1970(2) 0.00590(12) 0.0287(4) Uani 1 1 d . . . 
H3 H -0.0317 0.2407 -0.0423 0.034 Uiso 1 1 calc R . . 
C4 C 0.05853(10) 0.1489(2) 0.00373(13) 0.0346(5) Uani 1 1 d . . . 
H4 H 0.0672 0.1590 -0.0459 0.042 Uiso 1 1 calc R . . 
C5 C 0.10623(9) 0.0834(2) 0.07738(12) 0.0292(4) Uani 1 1 d . . . 
H5 H 0.1471 0.0511 0.0775 0.035 Uiso 1 1 calc R . . 
C6 C 0.09103(9) 0.06840(18) 0.14876(11) 0.0224(4) Uani 1 1 d . . . 
H6 H 0.1223 0.0236 0.1968 0.027 Uiso 1 1 calc R . . 
C7 C 0.14107(8) 0.22293(16) 0.32774(10) 0.0153(3) Uani 1 1 d . . . 
C8 C 0.19783(8) 0.13779(16) 0.37212(10) 0.0158(3) Uani 1 1 d . . . 
C9 C 0.25840(8) 0.16728(17) 0.36335(10) 0.0197(3) Uani 1 1 d . . . 
H9 H 0.2962 0.1125 0.3920 0.024 Uiso 1 1 calc R . . 
C10 C 0.26354(8) 0.27582(18) 0.31321(11) 0.0228(4) Uani 1 1 d . . . 
H10 H 0.3043 0.2927 0.3077 0.027 Uiso 1 1 calc R . . 
C11 C 0.20796(9) 0.35961(17) 0.27118(11) 0.0219(4) Uani 1 1 d . . . 
H11 H 0.2120 0.4331 0.2380 0.026 Uiso 1 1 calc R . . 
C12 C 0.14626(8) 0.33570(16) 0.27777(10) 0.0189(3) Uani 1 1 d . . . 
C13 C 0.19382(8) 0.01508(16) 0.42634(10) 0.0169(3) Uani 1 1 d . . . 
H13 H 0.1551 0.0305 0.4424 0.020 Uiso 1 1 calc R . . 
C14 C 0.18090(11) -0.11858(18) 0.37528(12) 0.0309(4) Uani 1 1 d . . . 
H14A H 0.1410 -0.1088 0.3231 0.046 Uiso 0.50 1 calc PR . . 
H14B H 0.1743 -0.1923 0.4093 0.046 Uiso 0.50 1 calc PR . . 
H14C H 0.2191 -0.1391 0.3612 0.046 Uiso 0.50 1 calc PR . . 
H14D H 0.2153 -0.1846 0.4060 0.046 Uiso 0.50 1 calc PR . . 
H14E H 0.1820 -0.1012 0.3197 0.046 Uiso 0.50 1 calc PR . . 
H14F H 0.1372 -0.1544 0.3678 0.046 Uiso 0.50 1 calc PR . . 
C15 C 0.25680(9) 0.00145(19) 0.50955(11) 0.0265(4) Uani 1 1 d . . . 
H15A H 0.2644 0.0864 0.5413 0.040 Uiso 0.50 1 calc PR . . 
H15B H 0.2953 -0.0187 0.4960 0.040 Uiso 0.50 1 calc PR . . 
H15C H 0.2504 -0.0720 0.5439 0.040 Uiso 0.50 1 calc PR . . 
H15D H 0.2757 -0.0892 0.5128 0.040 Uiso 0.50 1 calc PR . . 
H15E H 0.2448 0.0159 0.5581 0.040 Uiso 0.50 1 calc PR . . 
H15F H 0.2897 0.0691 0.5102 0.040 Uiso 0.50 1 calc PR . . 
C16 C 0.08713(9) 0.43365(17) 0.23650(11) 0.0240(4) Uani 1 1 d . . . 
H16 H 0.0454 0.3828 0.2275 0.029 Uiso 1 1 calc R . . 
C17 C 0.08146(10) 0.4889(3) 0.14833(15) 0.0460(6) Uani 1 1 d . . . 
H17A H 0.0432 0.5498 0.1254 0.069 Uiso 0.50 1 calc PR . . 
H17B H 0.0756 0.4131 0.1093 0.069 Uiso 0.50 1 calc PR . . 
H17C H 0.1221 0.5383 0.1552 0.069 Uiso 0.50 1 calc PR . . 
H17D H 0.1173 0.4509 0.1346 0.069 Uiso 0.50 1 calc PR . . 
H17E H 0.0850 0.5877 0.1506 0.069 Uiso 0.50 1 calc PR . . 
H17F H 0.0385 0.4625 0.1047 0.069 Uiso 0.50 1 calc PR . . 
C18 C 0.09310(11) 0.5520(2) 0.29956(16) 0.0510(7) Uani 1 1 d . . . 
H18A H 0.0558 0.6145 0.2740 0.077 Uiso 0.50 1 calc PR . . 
H18B H 0.1350 0.6004 0.3121 0.077 Uiso 0.50 1 calc PR . . 
H18C H 0.0923 0.5152 0.3520 0.077 Uiso 0.50 1 calc PR . . 
H18D H 0.1329 0.5389 0.3514 0.077 Uiso 0.50 1 calc PR . . 
H18E H 0.0537 0.5531 0.3133 0.077 Uiso 0.50 1 calc PR . . 
H18F H 0.0964 0.6382 0.2734 0.077 Uiso 0.50 1 calc PR . . 
 
loop_ 
 _atom_site_aniso_label 
 _atom_site_aniso_U_11 
 _atom_site_aniso_U_22 
 _atom_site_aniso_U_33 
 _atom_site_aniso_U_23 
 _atom_site_aniso_U_13 
 _atom_site_aniso_U_12 
Al1 0.0140(3) 0.0126(3) 0.0183(3) 0.000 0.0067(3) 0.000 
O1 0.0279(10) 0.0155(8) 0.0321(9) 0.000 0.0109(8) 0.000 
N1 0.0137(7) 0.0137(6) 0.0206(7) -0.0007(5) 0.0083(5) 0.0003(5) 
N2 0.0143(7) 0.0177(7) 0.0199(6) -0.0007(5) 0.0066(5) 0.0014(5) 
C1 0.0174(8) 0.0185(8) 0.0216(8) -0.0056(6) 0.0070(6) -0.0008(6) 
C2 0.0183(8) 0.0202(8) 0.0228(8) 0.0033(6) 0.0097(7) -0.0014(6) 
C3 0.0268(10) 0.0369(11) 0.0259(9) 0.0109(8) 0.0140(8) 0.0032(8) 
C4 0.0323(11) 0.0473(13) 0.0333(10) 0.0081(9) 0.0226(9) 0.0031(9) 
C5 0.0210(9) 0.0415(12) 0.0308(10) 0.0007(8) 0.0161(8) 0.0023(8) 
C6 0.0182(8) 0.0267(9) 0.0235(8) -0.0029(7) 0.0094(7) 0.0016(7) 
C7 0.0119(7) 0.0143(7) 0.0192(7) -0.0030(6) 0.0056(6) -0.0026(6) 
C8 0.0158(8) 0.0140(7) 0.0183(7) -0.0013(6) 0.0073(6) -0.0006(6) 
C9 0.0154(8) 0.0203(8) 0.0243(8) 0.0022(6) 0.0089(7) 0.0033(6) 
C10 0.0169(8) 0.0255(9) 0.0296(9) 0.0025(7) 0.0130(7) -0.0023(7) 
C11 0.0205(9) 0.0205(8) 0.0248(8) 0.0050(7) 0.0089(7) -0.0036(7) 
C12 0.0173(8) 0.0151(8) 0.0223(8) 0.0005(6) 0.0057(6) -0.0020(6) 
C13 0.0161(8) 0.0150(7) 0.0207(8) 0.0016(6) 0.0084(6) 0.0011(6) 
C14 0.0439(12) 0.0170(8) 0.0277(9) -0.0002(7) 0.0095(8) -0.0059(8) 
C15 0.0279(10) 0.0247(9) 0.0229(8) 0.0047(7) 0.0056(7) -0.0019(8) 
C16 0.0166(9) 0.0156(8) 0.0334(9) 0.0050(7) 0.0028(7) -0.0021(6) 
C17 0.0243(11) 0.0498(14) 0.0558(13) 0.0366(11) 0.0070(9) -0.0030(10) 
C18 0.0294(12) 0.0237(11) 0.0758(17) -0.0154(10) -0.0053(11) 0.0105(9) 
 
_geom_special_details 
; 
 All esds (except the esd in the dihedral angle between two l.s. planes) 
 are estimated using the full covariance matrix.  The cell esds are taken 
 into account individually in the estimation of esds in distances, angles 
 and torsion angles; correlations between esds in cell parameters are only 
 used when they are defined by crystal symmetry.  An approximate (isotropic) 
 treatment of cell esds is used for estimating esds involving l.s. planes. 
; 
 
loop_ 
 _geom_bond_atom_site_label_1 
 _geom_bond_atom_site_label_2 
 _geom_bond_distance 
 _geom_bond_site_symmetry_2 
 _geom_bond_publ_flag 
Al1 O1 1.7423(17) . ? 
Al1 N1 1.9351(13) . ? 
Al1 N1 1.9351(13) 2 ? 
Al1 N2 2.0284(13) 2 ? 
Al1 N2 2.0284(13) . ? 
O1 H1 0.8200 . ? 
N1 C1 1.3578(19) . ? 
N1 C7 1.4357(19) . ? 
N2 C6 1.354(2) . ? 
N2 C2 1.376(2) . ? 
C1 C2 1.396(2) 2 ? 
C1 H1A 0.9300 . ? 
C2 C1 1.396(2) 2 ? 
C2 C3 1.420(2) . ? 
C3 C4 1.355(3) . ? 
C3 H3 0.9300 . ? 
C4 C5 1.411(3) . ? 
C4 H4 0.9300 . ? 
C5 C6 1.372(2) . ? 
C5 H5 0.9300 . ? 
C6 H6 0.9300 . ? 
C7 C12 1.410(2) . ? 
C7 C8 1.416(2) . ? 
C8 C9 1.394(2) . ? 
C8 C13 1.522(2) . ? 
C9 C10 1.380(2) . ? 
C9 H9 0.9300 . ? 
C10 C11 1.385(2) . ? 
C10 H10 0.9300 . ? 
C11 C12 1.391(2) . ? 
C11 H11 0.9300 . ? 
C12 C16 1.516(2) . ? 
C13 C14 1.519(2) . ? 
C13 C15 1.522(2) . ? 
C13 H13 0.9800 . ? 
C14 H14A 0.9600 . ? 
C14 H14B 0.9600 . ? 
C14 H14C 0.9600 . ? 
C14 H14D 0.9600 . ? 
C14 H14E 0.9600 . ? 
C14 H14F 0.9600 . ? 
C15 H15A 0.9600 . ? 
C15 H15B 0.9600 . ? 
C15 H15C 0.9600 . ? 
C15 H15D 0.9600 . ? 
C15 H15E 0.9600 . ? 
C15 H15F 0.9600 . ? 
C16 C18 1.534(3) . ? 
C16 C17 1.538(3) . ? 
C16 H16 0.9800 . ? 
C17 H17A 0.9600 . ? 
C17 H17B 0.9600 . ? 
C17 H17C 0.9600 . ? 
C17 H17D 0.9600 . ? 
C17 H17E 0.9600 . ? 
C17 H17F 0.9600 . ? 
C18 H18A 0.9600 . ? 
C18 H18B 0.9600 . ? 
C18 H18C 0.9600 . ? 
C18 H18D 0.9600 . ? 
C18 H18E 0.9600 . ? 
C18 H18F 0.9600 . ? 
 
loop_ 
 _geom_angle_atom_site_label_1 
 _geom_angle_atom_site_label_2 
 _geom_angle_atom_site_label_3 
 _geom_angle 
 _geom_angle_site_symmetry_1 
 _geom_angle_site_symmetry_3 
 _geom_angle_publ_flag 
O1 Al1 N1 118.92(4) . . ? 
O1 Al1 N1 118.92(4) . 2 ? 
N1 Al1 N1 122.16(8) . 2 ? 
O1 Al1 N2 95.40(4) . 2 ? 
N1 Al1 N2 81.16(5) . 2 ? 
N1 Al1 N2 93.59(5) 2 2 ? 
O1 Al1 N2 95.40(4) . . ? 
N1 Al1 N2 93.59(5) . . ? 
N1 Al1 N2 81.16(5) 2 . ? 
N2 Al1 N2 169.19(8) 2 . ? 
Al1 O1 H1 109.5 . . ? 
C1 N1 C7 116.31(13) . . ? 
C1 N1 Al1 114.72(10) . . ? 
C7 N1 Al1 128.65(10) . . ? 
C6 N2 C2 117.98(14) . . ? 
C6 N2 Al1 129.14(11) . . ? 
C2 N2 Al1 112.79(10) . . ? 
N1 C1 C2 117.47(14) . 2 ? 
N1 C1 H1A 121.3 . . ? 
C2 C1 H1A 121.3 2 . ? 
N2 C2 C1 113.83(14) . 2 ? 
N2 C2 C3 120.46(15) . . ? 
C1 C2 C3 125.69(16) 2 . ? 
C4 C3 C2 120.08(17) . . ? 
C4 C3 H3 120.0 . . ? 
C2 C3 H3 120.0 . . ? 
C3 C4 C5 119.38(17) . . ? 
C3 C4 H4 120.3 . . ? 
C5 C4 H4 120.3 . . ? 
C6 C5 C4 118.56(17) . . ? 
C6 C5 H5 120.7 . . ? 
C4 C5 H5 120.7 . . ? 
N2 C6 C5 123.53(16) . . ? 
N2 C6 H6 118.2 . . ? 
C5 C6 H6 118.2 . . ? 
C12 C7 C8 120.86(14) . . ? 
C12 C7 N1 119.78(14) . . ? 
C8 C7 N1 119.35(14) . . ? 
C9 C8 C7 117.93(14) . . ? 
C9 C8 C13 119.93(14) . . ? 
C7 C8 C13 122.13(14) . . ? 
C10 C9 C8 121.56(15) . . ? 
C10 C9 H9 119.2 . . ? 
C8 C9 H9 119.2 . . ? 
C9 C10 C11 119.97(15) . . ? 
C9 C10 H10 120.0 . . ? 
C11 C10 H10 120.0 . . ? 
C10 C11 C12 121.10(15) . . ? 
C10 C11 H11 119.4 . . ? 
C12 C11 H11 119.4 . . ? 
C11 C12 C7 118.56(15) . . ? 
C11 C12 C16 120.65(14) . . ? 
C7 C12 C16 120.69(14) . . ? 
C14 C13 C15 110.21(14) . . ? 
C14 C13 C8 111.54(13) . . ? 
C15 C13 C8 112.40(13) . . ? 
C14 C13 H13 107.5 . . ? 
C15 C13 H13 107.5 . . ? 
C8 C13 H13 107.5 . . ? 
C13 C14 H14A 109.5 . . ? 
C13 C14 H14B 109.5 . . ? 
H14A C14 H14B 109.5 . . ? 
C13 C14 H14C 109.5 . . ? 
H14A C14 H14C 109.5 . . ? 
H14B C14 H14C 109.5 . . ? 
C13 C14 H14D 109.5 . . ? 
H14A C14 H14D 141.1 . . ? 
H14B C14 H14D 56.3 . . ? 
H14C C14 H14D 56.3 . . ? 
C13 C14 H14E 109.5 . . ? 
H14A C14 H14E 56.3 . . ? 
H14B C14 H14E 141.1 . . ? 
H14C C14 H14E 56.3 . . ? 
H14D C14 H14E 109.5 . . ? 
C13 C14 H14F 109.5 . . ? 
H14A C14 H14F 56.3 . . ? 
H14B C14 H14F 56.3 . . ? 
H14C C14 H14F 141.1 . . ? 
H14D C14 H14F 109.5 . . ? 
H14E C14 H14F 109.5 . . ? 
C13 C15 H15A 109.5 . . ? 
C13 C15 H15B 109.5 . . ? 
H15A C15 H15B 109.5 . . ? 
C13 C15 H15C 109.5 . . ? 
H15A C15 H15C 109.5 . . ? 
H15B C15 H15C 109.5 . . ? 
C13 C15 H15D 109.5 . . ? 
H15A C15 H15D 141.1 . . ? 
H15B C15 H15D 56.3 . . ? 
H15C C15 H15D 56.3 . . ? 
C13 C15 H15E 109.5 . . ? 
H15A C15 H15E 56.3 . . ? 
H15B C15 H15E 141.1 . . ? 
H15C C15 H15E 56.3 . . ? 
H15D C15 H15E 109.5 . . ? 
C13 C15 H15F 109.5 . . ? 
H15A C15 H15F 56.3 . . ? 
H15B C15 H15F 56.3 . . ? 
H15C C15 H15F 141.1 . . ? 
H15D C15 H15F 109.5 . . ? 
H15E C15 H15F 109.5 . . ? 
C12 C16 C18 108.89(15) . . ? 
C12 C16 C17 113.24(16) . . ? 
C18 C16 C17 111.21(18) . . ? 
C12 C16 H16 107.8 . . ? 
C18 C16 H16 107.8 . . ? 
C17 C16 H16 107.8 . . ? 
C16 C17 H17A 109.5 . . ? 
C16 C17 H17B 109.5 . . ? 
H17A C17 H17B 109.5 . . ? 
C16 C17 H17C 109.5 . . ? 
H17A C17 H17C 109.5 . . ? 
H17B C17 H17C 109.5 . . ? 
C16 C17 H17D 109.5 . . ? 
H17A C17 H17D 141.1 . . ? 
H17B C17 H17D 56.3 . . ? 
H17C C17 H17D 56.3 . . ? 
C16 C17 H17E 109.5 . . ? 
H17A C17 H17E 56.3 . . ? 
H17B C17 H17E 141.1 . . ? 
H17C C17 H17E 56.3 . . ? 
H17D C17 H17E 109.5 . . ? 
C16 C17 H17F 109.5 . . ? 
H17A C17 H17F 56.3 . . ? 
H17B C17 H17F 56.3 . . ? 
H17C C17 H17F 141.1 . . ? 
H17D C17 H17F 109.5 . . ? 
H17E C17 H17F 109.5 . . ? 
C16 C18 H18A 109.5 . . ? 
C16 C18 H18B 109.5 . . ? 
H18A C18 H18B 109.5 . . ? 
C16 C18 H18C 109.5 . . ? 
H18A C18 H18C 109.5 . . ? 
H18B C18 H18C 109.5 . . ? 
C16 C18 H18D 109.5 . . ? 
H18A C18 H18D 141.1 . . ? 
H18B C18 H18D 56.3 . . ? 
H18C C18 H18D 56.3 . . ? 
C16 C18 H18E 109.5 . . ? 
H18A C18 H18E 56.3 . . ? 
H18B C18 H18E 141.1 . . ? 
H18C C18 H18E 56.3 . . ? 
H18D C18 H18E 109.5 . . ? 
C16 C18 H18F 109.5 . . ? 
H18A C18 H18F 56.3 . . ? 
H18B C18 H18F 56.3 . . ? 
H18C C18 H18F 141.1 . . ? 
H18D C18 H18F 109.5 . . ? 
H18E C18 H18F 109.5 . . ? 
 
loop_ 
 _geom_torsion_atom_site_label_1 
 _geom_torsion_atom_site_label_2 
 _geom_torsion_atom_site_label_3 
 _geom_torsion_atom_site_label_4 
 _geom_torsion 
 _geom_torsion_site_symmetry_1 
 _geom_torsion_site_symmetry_2 
 _geom_torsion_site_symmetry_3 
 _geom_torsion_site_symmetry_4 
 _geom_torsion_publ_flag 
O1 Al1 N1 C1 -91.18(11) . . . . ? 
N1 Al1 N1 C1 88.81(11) 2 . . . ? 
N2 Al1 N1 C1 0.13(11) 2 . . . ? 
N2 Al1 N1 C1 170.63(11) . . . . ? 
O1 Al1 N1 C7 82.04(13) . . . . ? 
N1 Al1 N1 C7 -97.96(13) 2 . . . ? 
N2 Al1 N1 C7 173.36(14) 2 . . . ? 
N2 Al1 N1 C7 -16.15(13) . . . . ? 
O1 Al1 N2 C6 -59.19(14) . . . . ? 
N1 Al1 N2 C6 60.32(15) . . . . ? 
N1 Al1 N2 C6 -177.67(15) 2 . . . ? 
N2 Al1 N2 C6 120.80(14) 2 . . . ? 
O1 Al1 N2 C2 117.45(11) . . . . ? 
N1 Al1 N2 C2 -123.03(12) . . . . ? 
N1 Al1 N2 C2 -1.03(11) 2 . . . ? 
N2 Al1 N2 C2 -62.55(11) 2 . . . ? 
C7 N1 C1 C2 -173.30(14) . . . 2 ? 
Al1 N1 C1 C2 0.80(19) . . . 2 ? 
C6 N2 C2 C1 178.76(14) . . . 2 ? 
Al1 N2 C2 C1 1.70(18) . . . 2 ? 
C6 N2 C2 C3 0.3(2) . . . . ? 
Al1 N2 C2 C3 -176.74(13) . . . . ? 
N2 C2 C3 C4 -0.4(3) . . . . ? 
C1 C2 C3 C4 -178.64(19) 2 . . . ? 
C2 C3 C4 C5 -0.3(3) . . . . ? 
C3 C4 C5 C6 1.1(3) . . . . ? 
C2 N2 C6 C5 0.5(3) . . . . ? 
Al1 N2 C6 C5 177.00(14) . . . . ? 
C4 C5 C6 N2 -1.2(3) . . . . ? 
C1 N1 C7 C12 -106.95(17) . . . . ? 
Al1 N1 C7 C12 79.91(17) . . . . ? 
C1 N1 C7 C8 74.11(18) . . . . ? 
Al1 N1 C7 C8 -99.03(16) . . . . ? 
C12 C7 C8 C9 -1.3(2) . . . . ? 
N1 C7 C8 C9 177.62(14) . . . . ? 
C12 C7 C8 C13 -179.82(14) . . . . ? 
N1 C7 C8 C13 -0.9(2) . . . . ? 
C7 C8 C9 C10 0.0(2) . . . . ? 
C13 C8 C9 C10 178.57(15) . . . . ? 
C8 C9 C10 C11 0.9(3) . . . . ? 
C9 C10 C11 C12 -0.6(3) . . . . ? 
C10 C11 C12 C7 -0.6(2) . . . . ? 
C10 C11 C12 C16 175.85(16) . . . . ? 
C8 C7 C12 C11 1.6(2) . . . . ? 
N1 C7 C12 C11 -177.33(14) . . . . ? 
C8 C7 C12 C16 -174.86(14) . . . . ? 
N1 C7 C12 C16 6.2(2) . . . . ? 
C9 C8 C13 C14 -83.00(19) . . . . ? 
C7 C8 C13 C14 95.48(18) . . . . ? 
C9 C8 C13 C15 41.4(2) . . . . ? 
C7 C8 C13 C15 -140.15(15) . . . . ? 
C11 C12 C16 C18 -86.0(2) . . . . ? 
C7 C12 C16 C18 90.4(2) . . . . ? 
C11 C12 C16 C17 38.3(2) . . . . ? 
C7 C12 C16 C17 -145.34(17) . . . . ? 
 
_diffrn_measured_fraction_theta_max    0.995 
_diffrn_reflns_theta_full              31.56 
_diffrn_measured_fraction_theta_full   0.995 
_refine_diff_density_max    0.451 
_refine_diff_density_min   -0.350 
_refine_diff_density_rms    0.067 
